# Genetic variation and RNA structure regulate microRNA biogenesis

Noemi Fernandez<sup>1,3</sup>, Ross A. Cordiner<sup>1,3</sup>, Robert S. Young<sup>1</sup>, Nele Hug<sup>1</sup>, Sara Macias<sup>1,2</sup> & Javier F. Cáceres<sup>1</sup>

<sup>1</sup>Medical Research Council Human Genetics Unit, Institute of Genetics and Molecular Medicine, University of Edinburgh, Edinburgh, UK.

<sup>2</sup> Present address: Institute of Infection and Immunology Research, University of Edinburgh, King's Buildings, Edinburgh, UK

Correspondence should be addressed to J.F.C. (Javier.Caceres@igmm.ed.ac.uk)

<sup>3</sup>These authors contributed equally to this work

Running title: Sequence and structural determinants of miRNA biogenesis in human cells

[*Keywords:* microRNAs; miR-30c-1; RNA secondary structure; Drosha; Microprocessor; SHAPE]

30

31 **MiRNA biogenesis is highly regulated at the post-transcriptional level; however,**  
 32 **the role of sequence and secondary RNA structure in this process has not been**  
 33 **extensively studied. A single G to A substitution present in the terminal loop of**  
 34 **pri-mir-30c-1 in breast cancer patients had been previously described to result in**  
 35 **increased levels of mature miRNA. Here, we report that this genetic variant**  
 36 **directly affects Drosha-mediated processing of pri-mir-30c-1 *in vitro* and in**  
 37 **cultured cells. Structural analysis of this variant revealed an altered RNA**  
 38 **structure that facilitates the interaction with SRSF3, an SR protein family**  
 39 **member that promotes pri-miRNA processing. Our results are compatible with a**  
 40 **model whereby a genetic variant in pri-mir-30c-1 leads to a secondary RNA**  
 41 **structure rearrangement that facilitates binding of SRSF3 resulting in increased**  
 42 **levels of miR-30c. These data highlights that primary sequence determinants and**  
 43 **RNA structure are key regulators of miRNA biogenesis.**

44

45 MicroRNAs (miRNAs) are short non-coding RNAs that negatively regulate the  
46 expression of a large proportion of cellular mRNAs, thus affecting a multitude of  
47 cellular and developmental pathways<sup>1,2</sup>. The canonical miRNA biogenesis pathway  
48 involves two sequential processing events catalyzed by RNase III enzymes. In the  
49 nucleus, the Microprocessor complex, comprising the RNase III enzyme Drosha, the  
50 double-stranded RNA-binding protein, DGCR8, and additional proteins carries out  
51 the first processing event, which results in the production of precursor miRNAs (pre-  
52 miRNAs)<sup>3,4</sup>. These are exported to the cytoplasm, where a second processing event  
53 carried out by another RNase III enzyme, Dicer, leads to the production of mature  
54 miRNAs that are loaded into the RISC complex<sup>5</sup>.

55 Due to the central role of miRNAs in the control of gene expression, their levels  
56 must be tightly controlled. As such, dysregulation of miRNA expression has been  
57 shown to result in grossly aberrant gene expression and leads to human disease<sup>6-9</sup>. In  
58 particular, the Microprocessor-mediated step of miRNA biogenesis has been shown to  
59 be regulated by multiple signaling pathways, including the transforming growth  
60 factor- $\beta$  (TGF- $\beta$ ) pathway as well as the p53 response, leading to activation of subsets  
61 of individual miRNAs<sup>10,11</sup>. Furthermore, altered miRNA expression has been  
62 associated with the progression of cancer<sup>12,13</sup>, where a global downregulation of  
63 miRNA expression is usually observed<sup>14,15</sup>. It was recently shown that miRNA  
64 biogenesis can also be regulated in a cell-density-dependent manner via the Hippo-  
65 signaling pathway, and that the observed perturbation of this pathway in tumors may  
66 underlie the widespread downregulation of miRNAs in cancer<sup>16</sup>. Thus, miRNA  
67 production is tightly controlled at different levels during the biogenesis cascade.  
68 Extensive evidence has shown that RNA-binding proteins (RNA-BPs) recognize the  
69 terminal loop of miRNA precursors and influence either positively or negatively the

70 processing steps carried out by Drosha in the nucleus and/or Dicer in the cytoplasm.  
71 These include the hnRNP proteins, hnRNP K and hnRNP A1, as well as the cold-shock  
72 domain protein, Lin28 and the RNA helicases, p68/p72<sup>17</sup>. In the case of the  
73 multifunctional RNA-binding protein hnRNP A1, we have previously shown that it  
74 can act as an auxiliary factor by binding to the conserved terminal loop of pri-miR-  
75 18a and promote its Microprocessor-mediated processing<sup>18,19</sup>. Conversely, the same  
76 protein can act as a repressor of let-7 production in differentiated cells<sup>20</sup>.

77 Several studies have shown that there is a correlation between the presence of  
78 polymorphisms in pri-miRNAs and the corresponding levels of mature miRNAs<sup>21</sup>;  
79 however, a mechanistic understanding of how sequence variation and RNA structure  
80 control miRNA biogenesis has not been explored in great detail. Screening of novel  
81 genetic variants in human precursor miRNAs linked to breast cancer identified two  
82 novel rare variants in the precursors of miR-30c and miR-17, resulting in  
83 conformational changes in the predicted secondary structures and also leading to  
84 altered expression of the corresponding mature miRNAs. These patients were non-  
85 carriers of BRCA1 or BRCA2 mutations, suggesting the possibility that familial  
86 breast cancer may be caused by variation in these miRNAs<sup>22</sup>. In particular, the single  
87 G to A substitution in primary miR-30c-1 (pri-mir-30c-1) terminal loop, which was  
88 also later observed in gastric cancer patients<sup>23</sup>, results in an increase in the abundance  
89 of the mature miRNA.

90 Here, we investigated the mechanism by which the pri-mir-30c-1 variant detected  
91 in breast cancer patients results in an increased expression of this miRNA. We found  
92 that this genetic variant directly affects the Microprocessor-mediated processing of  
93 this miRNA. A combination of structural analysis with RNA chromatography coupled  
94 to Mass spectrometry revealed changes in the pri-miRNA structure that lead to

differential binding of a protein factor, SRSF3, that has been previously reported to act as a miRNA biogenesis factor. These results provide a mechanism by which the pri-mir-30c-1 genetic variant results in an increased expression of the mature miR-30c. Altogether these data highlights that primary sequence as well as RNA structure have a crucial role in the post-transcriptional regulation of miRNA biogenesis.

## RESULTS

### The G/A substitution in pri-miR-30c-1 affects the Microprocessor-mediated processing of the primary miRNA

In order to understand the mechanism underlying miR-30c deregulation in breast and gastric cancers, we investigated how the reported G<sub>27</sub>-to-A mutation observed in a Chinese population might affect miRNA biogenesis. It was previously shown that this substitution results in an increase in the abundance of the mature miRNA; however, the mechanism that leads to an increased expression is unknown<sup>22,23</sup>. First, we transiently transfected MCF7 breast cancer cells with constructs encoding 380 nucleotides (nt) of primary hsa-pri-mir-30c-1 (pri-miRNA), either in a WT version or bearing the G/A variant (**Fig. 1a**). We observed that the G/A substitution resulted in increased levels of mature miR-30c (**Fig. 1b**), resembling the situation observed in patients with this mutation. Furthermore, this was not due to increased transcription of the G/A-harboring pri-miRNA, as shown by unchanged levels pri-miRNA levels (data not shown). In order to dissect the precise step of miRNA biogenesis pathway that is affected by the G/A substitution, we used an RNA version of pri-mir-30c-1 that has yet to undergo processing by the Microprocessor in the nucleus and by Dicer in the cytoplasm (pri-miRNA). As a counterpart, we transfected an RNA oligonucleotide that mimics the precursor miRNA (pre-miRNA), a sequence that arises upon

120 processing by the Microprocessor. Importantly, we observed approximately a two-  
 121 three fold increase of miR-30c mature levels when transfecting the G/A sequence  
 122 derived from the pri-miRNA sequence, whereas no changes were detected following  
 123 transfection of the pre-miRNA sequence (**Fig. 1c**). This experiment demonstrates that  
 124 the G/A substitution exclusively affects the Drosha-mediated processing of the pri-  
 125 miRNA. Moreover, we could recapitulate this result in an *in vitro* reaction. We found  
 126 that *in vitro* transcribed pri-mir-30c-1 was readily processed in the presence of MCF7  
 127 total extracts, rendering a product of ~65 nts that corresponds to pre-mir-30c.  
 128 Notably, the processing of the G/A variant was increased, when compared to the WT  
 129 version, as was observed in living cells (**Fig. 1d**). The effect of the G/A variation in  
 130 the processing of pri-mir-30c-1 was also recapitulated using a purified  
 131 Microprocessor (FLAG-Drosha/FLAG-DGCR8 complex) and a shorter *in vitro*  
 132 transcribed substrate (153nt) (**Supplementary Fig. 1**). Altogether, these  
 133 complementary approaches indicate an enhanced Microprocessor-mediated  
 134 processing of the G/A variant sequence and this recapitulates what was previously  
 135 observed in breast and gastric cancer patients.

136

### 137 **The sequence of the terminal loop in pri-miR-30c-1 is highly conserved across** 138 **species**

139 Experiments described above confirmed a crucial role for the G<sub>27</sub> residue in  
 140 influencing miR-30c biogenesis. We analyzed the genomic variation in the hsa-pri-  
 141 mir-30c-1 sequence across vertebrates, and detected substantial evolutionary  
 142 constraint across the entire locus, as indicated by positive GERP (Genomic  
 143 Evolutionary Rate Profiling) scores (**Fig. 2a**). Constrained residues, which highlight  
 144 regions under purifying selection, are located in the mature miRNA sequences in both

145 arms, as expected due to their effect in the regulation of gene expression.  
146 Interestingly, part of the terminal loop (TL), where G<sub>27</sub> is embedded, has also a very  
147 high level of constraint, which is suggestive of a role of this sequence in miRNA  
148 biogenesis, as was previously described for a subset of miRNAs<sup>17,19,24</sup>. In addition,  
149 residues at the 5' end (nts -1 to -8; -11 to -16 and -20 to -23) and the 3' end (nts +1 to  
150 +16 and +18 to +25) are also highly constrained. Indeed, several of these residues  
151 were included as part of the stem in the *in silico* predicted RNA structure suggesting  
152 their importance for maintaining the RNA secondary structure (**Fig. 2b**). These data  
153 led us to focus our attention on these invariant sequences as potentially having a  
154 crucial role in the regulation of miR-30c biogenesis.

155

# 156 **RNA structural analysis reveals the specific requirement of G<sub>27</sub> for maintaining** 157 **the pri-miRNA structure**

158 Next, in order to establish the importance of the G<sub>27</sub> to A substitution in RNA  
159 structure, we performed structural analysis by Selective 2'-hydroxyl acylation  
160 analyzed by primer extension (SHAPE)<sup>25</sup>. This approach allows performing  
161 quantitative RNA structural analysis at single nucleotide resolution and is mostly  
162 independent of base composition. While highly reactive residues are located at single-  
163 stranded regions, non-reactive nucleotides are involved in base pairs, non-Watson-  
164 Crick base pairs, tertiary interactions or single stacking interactions in the C2'-endo  
165 conformation<sup>26</sup>. To this end, *in vitro* transcribed RNA comprising 380 nt of pri-miR-  
166 30c-1 (either wild-type or the G/A variant sequence) was treated with N-methylisatoic  
167 anhydride (NMIA), which reacts with the 2'-hydroxyl group of flexible nucleotides  
168 (**Fig. 3a**). Gross modifications of SHAPE reactivity were observed in specific regions  
169 of the G/A variant, when compared with the wild-type sequence. The resulting

170 profiles revealed a decreased SHAPE reactivity in the TL (residues 28-30), with a  
171 concomitant increase in the 5' region (-18,-16, and -15) as well as in the 3' end (nts  
172 +11, +16 and +19) (**Fig. 3a,b**). This result indicated the presence of different  
173 conformations in the pri-miRNA with the G-to-A substitution, as compared to its  
174 wild-type counterpart. In order to gain more information into the folding and tertiary  
175 structure of this pri-miRNA, we assessed the solvent accessibility of each nucleotide  
176 by hydroxyl radical cleavage footprinting, generated by reduction of hydrogen  
177 peroxide by iron (II)<sup>27</sup>. Hydroxyl radicals break the accessible backbone of RNA with  
178 no sequence dependence. We defined buried regions, as zones with more than two  
179 consecutives nucleotides having a reactivity (R) smaller than the mean of all  
180 reactivity, whereas exposed regions are those with more than two consecutive  
181 nucleotides having R larger than the mean of all reactivity. We observed that the wild-  
182 type sequence presents two buried regions located between nts 8 to 40 and +9 to +25,  
183 as well as two exposed segments between nt -25 to 7 and nts 40 to +8  
184 (**Supplementary Fig. 2a**). The G to A substitution caused changes in the exposure to  
185 solvent, with both the TL (nts 28 to 40) and also the 3' end region (nts +17 to +22)  
186 becoming solvent accessible. By contrast, the 5' end (nts -7 to 7) and a small region in  
187 miRNA-3p (nts 55 to 58) are no longer solvent accessible.

188 Altogether, the SHAPE and radical hydroxyl data suggest that the G<sub>27</sub>A  
189 substitution is indeed affecting the RNA flexibility of pri-miRNA-30c-1, modifying  
190 both base-pairing interaction as well as solvent accessibility of the nucleotides located  
191 in the TL and in the basal region of the stem. This could be a consequence of a long  
192 distance interaction disruption between those regions (**Fig. 3c** and **Supplementary**  
193 **Fig. 2b**), which could in turn modify the interaction with RNA-binding proteins  
194 important for miR-30c biogenesis.



195

196 **SRSF3 binds to a basal region of hsa-pri-mir-30c-1**

197 A working model that emerges from data described above is that either a repressor of  
198 Microprocessor-mediated processing binds to the wild-type sequence or, alternatively,  
199 the change in RNA structure induced by the G/A sequence variation could lead to the  
200 binding of an activator. In order to identify RNA-BPs that differentially bind to either  
201 the pri-miR-30c-1 WT or G/A sequence, we performed RNase-assisted  
202 chromatography followed by mass spectrometry in MCF7 total cell extracts<sup>28</sup>. This  
203 resulted in the identification of twelve proteins that interact with the WT sequence  
204 and eight that bind to the G/A variant, being 7 common between both substrates.  
205 Significantly, several of the common proteins were previously implicated in miRNA  
206 biogenesis and/or regulation, including the heat shock cognate 70 protein<sup>5</sup>, the hnRNP  
207 proteins, hnRNP A1<sup>18,20</sup> and hnRNP A2/B1<sup>29</sup>, as well as the RNA helicase DDX17<sup>4</sup>,  
208 and Poly [ADP-ribose] polymerase 1 (PARP)<sup>30</sup> (**Fig. 4a** and **Supplementary Fig. 3a**).

209 We decided to focus on those interactors that showed preferential interaction with  
210 either the WT or the G/A variant sequence. In this category, the most likely candidate  
211 that interacted with the WT sequence is the RNA-binding protein FUS/TLS (fused in  
212 sarcoma/translocated in liposarcoma). Interestingly, this protein has been shown to  
213 promote miRNA biogenesis by facilitating the co-transcriptional recruitment of  
214 Drosha<sup>31</sup>; however, we could not validate the specific interaction between FUS and  
215 miR-30c-1 WT sequence by Immunoprecipitation followed by Western blot analysis  
216 (IP-WB) (**Supplementary Fig. 3b**). As for the G/A variant, there was a single  
217 exclusive interactor, SRSF3, which is a member of the SR family of splicing  
218 regulators. These family of proteins are involved in constitutive and alternative  
219 splicing, but some of them have been shown to fulfil other cellular functions<sup>32,33</sup>.

220 Importantly, SRSF3 has also been reported to be required for miRNA biogenesis<sup>34</sup>.  
 221 We could validate this interaction by RNA chromatography followed by Western-blot  
 222 analysis with an antibody specific for SRSF3 (**Fig. 4b**). We also observed preferential  
 223 binding of endogenous SRSF3 protein to the G/A variant of pri-mir-30c-1, as shown  
 224 by immunoprecipitation of SRSF3 followed by RT-qPCR quantification of the  
 225 associated pri-miRNA (**Fig. 4c**). In order to analyze the interaction of SRSF3 with  
 226 pri-miR-30c-1 wild-type and G/A sequences, we carried out toeprint and SHAPE  
 227 assays using SRSF3 protein purified from MCF7 cells. Toeprint analysis was  
 228 performed with fluorescent labeled antisense primers and capillary electrophoresis<sup>35</sup>.  
 229 In this assay, bound SRSF3 will block the reverse transcriptase and will illuminate the  
 230 site where SRSF3 is bound to RNA. Prominent toeprint of SRSF3 with the G/A  
 231 sequence was observed around nt A<sub>+25</sub>-G<sub>+24</sub> (RNA size 170nt, position A<sub>+25</sub>)(**Fig. 4d**).  
 232 Similarly, analysis of SHAPE reactivity in the presence of added purified SRSF3,  
 233 revealed a dose-dependent protection from NMIA attack upon addition of SRSF3 in  
 234 specific RNA residues in a dose-dependent manner (nts -19, -18, +16,+18,+19) of the  
 235 basal region of G/A (**Fig. 4f,e**). Of importance, a conserved CNNC motif (nts from  
 236 +16 to +22), previously described as SRSF3 binding site<sup>34,36,37</sup> is located within the  
 237 recognition place. Together, we can conclude that the interaction of SRSF3 with pri-  
 238 miR-30c-1 takes place at the CNNC motif at the basal region of the G/A variant.

239

# **SRSF3 protein is responsible for the increased levels of the G/A variant of miR-30c**

242 As previously described, SRSF3 was proposed to have a role in miRNA biogenesis by  
 243 recognition of a CNNC motif located 17nts away from Drosha cleavage site<sup>34</sup>. Pri-  
 244 mir-30c-1 has two overlapping CNNC motifs (residues from +16 to +21). Notably,

accessibility around this region increased in the G/A variant, as determined by SHAPE and hydroxyl radical analysis (**Fig. 3** and **Supplementary Fig. 2**). Furthermore, toeprint and SHAPE assays in the presence of purified SRSF3 protein confirmed the specific recognition of the CNNC motif by SRSF3 in a dose-dependent manner (**Fig. 4**). Next, we addressed whether the preferential binding of SRSF3 to the pri-mir-30c G/A variant sequence was responsible for its increased expression by comparing the mature levels of miR-30c-1 wild-type or G/A variant under variable levels of SRSF3 expression. To this end, we co-transfected pri-mir-30c-1 constructs in MCF7 cells under transiently overexpression of SRSF3, or alternatively, transfected specific siRNAs to knock-down endogenous SRSF3 protein (**Supplementary Fig. 4**). Of interest, we observed that reduced levels of SRSF3 drastically decreased the levels of the G/A miR-30c variant, without affecting the levels of wild-type miR-30c (**Fig. 5a**, compare WT vs G/A panels). By contrast, transient overexpression of SRSF3 increased significantly the levels of wild-type mature miR-30c, but has a more modest effect on the G/A variant sequence. Altogether, these experiments suggest that SRSF3 binding is limiting in the WT scenario and that is essential to promote miRNA biogenesis in the G/A context.

To confirm the role of SRSF3 in the differential processing observed with pri-mir-30c-1 G/A variant sequence, we proceeded to mutate the two consecutive CNNC motifs that are the natural binding sites for SRSF3 (**Fig. 5b**). We generated a set of mutants that affected either the first or second CNNC motif (mut1 and mut2, respectively) or a deletion of both motifs ( $\Delta$ CNNC). The CNNCmut1 carrying a double substitution C<sub>+15</sub>U<sub>+17</sub> to AA, led to a severe reduction in the levels of miR-30c expression only with the G/A variant sequence (**Fig. 5b**). Similarly, a double substitution of the second CNNC motif G<sub>+20</sub>C<sub>+21</sub> to AA (CNNCmut2) behaved

270 similarly, exclusively affecting the G/A variant. This experiment strongly suggests  
271 that the binding of SRSF3 is an important determinant of miR-30c expression.  
272 Finally, we could recapitulate the observation that SRSF3 binding is limiting for the  
273 processing of wild-type pri-mir-30c-1 in an *in vitro* system, supplemented with  
274 purified SRSF3 protein (Fig. 6). Firstly, we found that the FLAG-Drosha/FLAG-  
275 DGCR8 complexes used for the *in vitro* processing assays contained residual levels of  
276 SRSF3 protein (**Supplementary Fig. 5**). Thus, the relative higher processing of the  
277 G/A variant can be explained by the preferential binding of SRSF3 present in the  
278 reaction to the G/A variant. Importantly, addition of purified SRSF3 protein increases  
279 the Microprocessor-mediated production of WT pre-mir-30c-1 (**Fig. 6a**), whereas  
280 addition of purified SRSF3 to the G/A variant (**Fig. 6c**) or to  $\Delta$ CNNC variants that  
281 lack SRSF3 binding sites did not affect the processing activity (**Fig. 6b, d**). This is  
282 reminiscent of what was observed in MCF7 cells under variable levels of SRSF3.

283

## 284 **DISCUSSION**

285 The central role of miRNAs in the regulation of gene expression requires that their  
286 expression is tightly controlled. Indeed, the biogenesis of cancer-related miRNAs,  
287 including those with a role as oncogenes ('oncomiRs), or those with tumor suppressor  
288 functions is often dysregulated in cancer<sup>13,15,38</sup>. Interestingly, some miRNAs have  
289 been shown to display both tumor suppressor and also oncogenic roles, depending on  
290 the cell type and the mRNA targets<sup>39</sup>, as was described for miR-221, which exerts  
291 oncogenic properties in the liver<sup>40</sup> but also acts as a tumor suppressor in erythroblastic  
292 leukemias<sup>41</sup>. Furthermore, miR-375 has been shown to display a dual role in prostate  
293 cancer progression, highlighting the importance of the cellular context on miRNA  
294 function<sup>42</sup>.

295 Despite a more comprehensive knowledge on the role of RNA-BPs in the post-  
296 transcriptional regulation of miRNA production, there is only circumstantial evidence  
297 on how RNA sequence variation and RNA structure impact on miRNA processing.  
298 There are several reports showing that a single nucleotide substitution in the sequence  
299 of precursor miRNAs could have a profound effect in their biogenesis. Nonetheless,  
300 there is limited information about SNPs in the terminal loop region (TL) of pri-  
301 miRNAs. A bioinformatic approach led to the identification of 32 such SNPs in 21  
302 miRNA loop regions of human miRNAs<sup>43</sup>. Some studies have found a correlation  
303 between the presence of polymorphisms in pri-miRNAs and expression levels of their  
304 corresponding mature miRNAs, affecting cancer susceptibility, as shown for miR-  
305 15/16 in chronic lymphocytic leukemia (CLL)<sup>44,45</sup>, miR-146 in papillary thyroid  
306 carcinoma<sup>46</sup> and miR196a2 in lung cancer<sup>47</sup>. Another example is the finding of a rare  
307 SNP in pre-miR-34a, which is associated with increased levels of mature miR-34a.  
308 This could be of biological significance since precise control of miR-34a expression is  
309 needed to maintain correct beta-cell function, thus this could affect type 2 diabetes  
310 susceptibility<sup>48</sup>. The emerging picture is that human genetic variation could indeed not  
311 only have a role in miRNA function by affecting miRNA seed sequences and/or  
312 miRNA binding sites in the 3'UTRs of target genes, but it can also contribute  
313 significantly to modulation of miRNA biogenesis<sup>21</sup>.

314 In this study, we focused on a rare genetic variation found in the conserved  
315 terminal loop of pri-mir-30c-1 (G<sub>27</sub> to A variant) that was found in breast cancer and  
316 gastric cancer patients and leading to increased expression of miR-30c<sup>22,23</sup>. There is  
317 circumstantial evidence that miR-30c is involved in many malignancies acting as  
318 tumour suppressor<sup>49,50</sup> or as an oncogene<sup>51-53</sup>. In order to understand the mechanism  
319 underlying miR-30c deregulation in breast cancer, we investigated how this mutation

affects miRNA biogenesis. We show that the G-A substitution in pri-mir-30c-1 directly affects Drosha-mediated processing both *in vitro* as well as in cultured cells (**Fig. 1, 5, 6 and Supplementary Fig. 1**). The conservation of pri-mir-30c-1 sequences across vertebrate species highlights the importance of the primary sequence in the TL, 5' and 3' regions (**Fig. 2**), suggesting a crucial role in miRNA biogenesis. Indeed, conserved sequences in TL have been shown to be important for recognition by auxiliary factors<sup>24</sup> as well as for DGCR8 binding<sup>54</sup>, allowing efficient and accurate miRNA processing. It has also been shown that pri-miRNA tertiary structure is a major player in the regulation of miRNA biogenesis, as observed for the well characterized miR17-92 cluster<sup>55-57</sup>. Here, using SHAPE structural analysis, in conjunction with solvent accessibility analysis by hydroxyl cleavage, we found that the G/A sequence variation leads to a structural rearrangement of the apical region of the pri-miRNA affecting the conserved residues placed at the basal part of the stem (**Fig. 3 and Supplementary Fig. 2**). This demonstrates that pri-mir-30c-1 is organized as a complex and flexible structure, with the TL and the basal region of the stem potentially involved in a tertiary interaction. Further work is required to determine the existence of direct contacts between these regions.

Interestingly, we also observed that this RNA structure reorganization promotes the interaction with SRSF3, an SR protein family member that was demonstrated to facilitate pri-miRNA recognition and processing<sup>34</sup>, by recognizing the CNNC motif located 17nts away from Drosha cleavage site. Pri-mir-30c-1 has two overlapping CNNC motifs (residues from +16 to +21) (**Fig. 5b**). Notably, accessibility around this region increased in G/A variant (**Fig. 3**). Furthermore, toeprint and SHAPE assays in the presence of purified SRSF3 protein clearly demonstrated that SRSF3 is specifically recognizing the CNNC motif in a dose-dependent manner (**Fig. 4**).

Altogether, data presented here suggest that binding of SRSF3 to the wild-type sequence is limiting and that the structural reorganization induced by the G/A substitution makes the SRSF3 binding sites more accessible. Taking everything into account we propose a model whereby a genetic variant in a conserved region within the TL of pri-mir-30c-1 causes a reorganization of the RNA secondary structure promoting the interaction with SRSF3, which in turn enhances the Microprocessor-mediated processing of pri-mir-30c-1 leading to increased levels of miR-30c (Fig. 7). We conclude that primary sequence determinants and RNA structure are key regulators of miRNA biogenesis.

## **METHODS**

Methods and any associated references are available in the online version of the paper

## **ACKNOWLEDGEMENTS**

We are grateful to David Fitzpatrick and Magdalena Maslon (MRC HGU) for discussions and to Javier Martinez (IMBA, Vienna) and Encarnación Martínez-Salas (CBM, Madrid) for critical reading of the manuscript. This work was supported by Core funding from the Medical Research Council and by the Wellcome Trust (Grant 095518/Z/11/Z).

## **AUTHOR CONTRIBUTIONS**

N.F., R.A.C, S.M. and J.F.C. conceived, designed, interpreted the experiments and wrote the manuscript. N.F. performed most of the experiments and data analysis. R.A.C. carried out *in vitro* pri-miRNA processing and N.H. performed biochemical

372 experiments. S.M. carried out some of the initial experiments. R.S.Y. provided  
373 bioinformatics analysis. J.F.C. supervised the whole project.

374

## 375 **COMPETING INTERESTS STATEMENT**

376 The authors declare that they have no competing financial interests.

377

## 378 **SUPPLEMENTAL INFORMATION**

379 Supplemental information includes 5 figures, Supplemental Experimental Procedures,  
380 and Supplemental References and can be found with this article online

381

382

## 383 **REFERENCES**

384

- 385 1. Ebert, M. S. & Sharp, P. A. Roles for microRNAs in conferring robustness to  
386 biological processes. *Cell* **149**, 515–24 (2012).
- 387 2. Shenoy, A. & Blalock, R. H. Regulation of microRNA function in somatic  
388 stem cell proliferation and differentiation. *Nat. Rev. Mol. Cell Biol.* **15**, 565–76  
389 (2014).
- 390 3. Denli, A. M., Tops, B. B. J., Plasterk, R. H. A., Ketting, R. F. & Hannon, G. J.  
391 Processing of primary microRNAs by the Microprocessor complex. *Nature*  
392 **432**, 231–5 (2004).
- 393 4. Gregory, R. I. *et al.* The Microprocessor complex mediates the genesis of  
394 microRNAs. *Nature* **432**, 235–40 (2004).
- 395 5. Ha, M. & Kim, V. N. Regulation of microRNA biogenesis. *Nat. Rev. Mol. Cell*  
396 *Biol.* **15**, 509–24 (2014).
- 397 6. Krol, J., Loedige, I. & Filipowicz, W. The widespread regulation of microRNA  
398 biogenesis, function and decay. *Nat. Rev. Genet.* **11**, 597–610 (2010).
- 399 7. Winter, J., Jung, S., Keller, S., Gregory, R. I. & Diederichs, S. Many roads to  
400 maturity: microRNA biogenesis pathways and their regulation. *Nat. Cell Biol.*  
401 **11**, 228–34 (2009).
- 402 8. Mendell, J. T. & Olson, E. N. MicroRNAs in stress signaling and human  
403 disease. *Cell* **148**, 1172–87 (2012).
- 404 9. Finnegan, E. F. & Pasquinelli, A. E. MicroRNA biogenesis: regulating the  
405 regulators. *Crit. Rev. Biochem. Mol. Biol.* **48**, 51–68
- 406 10. Davis, B. N., Hilyard, A. C., Lagna, G. & Hata, A. SMAD proteins control  
407 DROSHA-mediated microRNA maturation. *Nature* **454**, 56–61 (2008).



- 408 11. Suzuki, H. I. *et al.* Modulation of microRNA processing by p53. *Nature* **460**,  
409 529–33 (2009).
- 410 12. Garzon, R., Calin, G. A. & Croce, C. M. MicroRNAs in Cancer. *Annu. Rev.*  
411 *Med.* **60**, 167–79 (2009).
- 412 13. Hata, A. & Lieberman, J. Dysregulation of microRNA biogenesis and gene  
413 silencing in cancer. *Sci. Signal.* **8**, re3 (2015).
- 414 14. Lu, J. *et al.* MicroRNA expression profiles classify human cancers. *Nature* **435**,  
415 834–8 (2005).
- 416 15. Lin, S. & Gregory, R. I. MicroRNA biogenesis pathways in cancer. *Nat. Rev.*  
417 *Cancer* **15**, 321–333 (2015).
- 418 16. Mori, M. *et al.* Hippo Signaling Regulates Microprocessor and Links Cell-  
419 Density-Dependent miRNA Biogenesis to Cancer. *Cell* **156**, 893–906 (2014).
- 420 17. Castilla-Llorente, V., Nicastro, G. & Ramos, A. Terminal loop-mediated  
421 regulation of miRNA biogenesis: selectivity and mechanisms. *Biochem. Soc.*  
422 *Trans.* **41**, 861–5 (2013).
- 423 18. Guil, S. & Cáceres, J. F. The multifunctional RNA-binding protein hnRNP A1  
424 is required for processing of miR-18a. *Nat. Struct. Mol. Biol.* **14**, 591–6 (2007).
- 425 19. Michlewski, G., Guil, S., Semple, C. A. & Cáceres, J. F. Posttranscriptional  
426 regulation of miRNAs harboring conserved terminal loops. *Mol. Cell* **32**, 383–  
427 93 (2008).
- 428 20. Michlewski, G. & Cáceres, J. F. Antagonistic role of hnRNP A1 and KSRP in  
429 the regulation of let-7a biogenesis. *Nat. Struct. Mol. Biol.* **17**, 1011–8 (2010).
- 430 21. Hogg, D. R. & Harries, L. W. Human genetic variation and its effect on  
431 miRNA biogenesis, activity and function. *Biochem. Soc. Trans.* **42**, 1184–9  
432 (2014).
- 433 22. Shen, J., Ambrosone, C. B. & Zhao, H. Novel genetic variants in microRNA  
434 genes and familial breast cancer. *Int. J. Cancer* **124**, 1178–82 (2009).
- 435 23. Mu, Y. & Su, X. Polymorphism in pre-miR-30c contributes to gastric cancer  
436 risk in a Chinese population. *Med. Oncol.* **29**, 1723–32 (2012).
- 437 24. Choudhury, N. R. R. & Michlewski, G. Terminal loop-mediated control of  
438 microRNA biogenesis. *Biochem. Soc. Trans.* **40**, 789–93 (2012).
- 439 25. Wilkinson, K. A., Merino, E. J. & Weeks, K. M. Selective 2'-hydroxyl  
440 acylation analyzed by primer extension (SHAPE): quantitative RNA structure  
441 analysis at single nucleotide resolution. *Nat. Protoc.* **1**, 1610–6 (2006).
- 442 26. Mortimer, S. a & Weeks, K. M. C2'-endo nucleotides as molecular timers  
443 suggested by the folding of an RNA domain. *Proc. Natl. Acad. Sci. U. S. A.*  
444 **106**, 15622–7 (2009).
- 445 27. Tullius, T. D. & Greenbaum, J. A. Mapping nucleic acid structure by hydroxyl  
446 radical cleavage. *Curr. Opin. Chem. Biol.* **9**, 127–34 (2005).
- 447 28. Michlewski, G. & Cáceres, J. F. RNase-assisted RNA chromatography. *RNA*  
448 **16**, 1673–8 (2010).

- 449 29. Villarroya-Beltri, C. *et al.* Sumoylated hnRNP A2B1 controls the sorting of  
450 miRNAs into exosomes through binding to specific motifs. *Nat. Commun.* **4**,  
451 2980 (2013).
- 452 30. Leung, A. K. L. *et al.* Poly(ADP-ribose) regulates stress responses and  
453 microRNA activity in the cytoplasm. *Mol. Cell* **42**, 489–99 (2011).
- 454 31. Morlando, M. *et al.* FUS stimulates microRNA biogenesis by facilitating co-  
455 transcriptional Drosha recruitment. *EMBO J.* **31**, 4502–10 (2012).
- 456 32. Long, J. C. & Cáceres, J. F. The SR protein family of splicing factors: master  
457 regulators of gene expression. *Biochem. J.* **417**, 15–27 (2009).
- 458
- 459 33. Howard, J. M. & Sanford, J. R. The RNAissance family: SR proteins as  
460 multifaceted regulators of gene expression. *Wiley Interdiscip. Rev. RNA* (2014).  
461 doi:10.1002/wrna.1260
- 462 34. Auyeung, V. C., Ulitsky, I., McGeary, S. E. & Bartel, D. P. Beyond secondary  
463 structure: primary-sequence determinants license pri-miRNA hairpins for  
464 processing. *Cell* **152**, 844–58 (2013).
- 465 35. Gould, P. S., Bird, H. & Easton, A. J. Translation toeprinting assays using  
466 fluorescently labeled primers and capillary electrophoresis. *Biotechniques* **38**,  
467 397–400 (2005).
- 468 36. Hargous, Y. *et al.* Molecular basis of RNA recognition and TAP binding by the  
469 SR proteins SRp20 and 9G8. *EMBO J.* **25**, 5126–37 (2006).
- 470 37. Ankö, M.-L., Morales, L., Henry, I., Beyer, A. & Neugebauer, K. M. Global  
471 analysis reveals SRp20- and SRp75-specific mRNPs in cycling and neural  
472 cells. *Nat. Struct. Mol. Biol.* **17**, 962–70 (2010).
- 473 38. Ohtsuka, M., Ling, H., Doki, Y., Mori, M. & Calin, G. A. MicroRNA  
474 Processing and Human Cancer. *J. Clin. Med.* **4**, 1651–1667 (2015).
- 475 39. Kent, O. A. & Mendell, J. T. A small piece in the cancer puzzle: microRNAs as  
476 tumor suppressors and oncogenes. *Oncogene* **25**, 6188–96 (2006).
- 477 40. Pineau, P. *et al.* miR-221 overexpression contributes to liver tumorigenesis.  
478 *Proc. Natl. Acad. Sci. U. S. A.* **107**, 264–9 (2010).
- 479 41. Felli, N. *et al.* MicroRNAs 221 and 222 inhibit normal erythropoiesis and  
480 erythroleukemic cell growth via kit receptor down-modulation. *Proc. Natl.*  
481 *Acad. Sci. U. S. A.* **102**, 18081–6 (2005).
- 482 42. Costa-Pinheiro, P. *et al.* MicroRNA-375 plays a dual role in prostate  
483 carcinogenesis. *Clin. Epigenetics* **7**, 1–14 (2015).
- 484 43. Xiong, X., Kang, X., Zheng, Y., Yue, S. & Zhu, S. Identification of loop  
485 nucleotide polymorphisms affecting microRNA processing and function. *Mol.*  
486 *Cells* **36**, 518–26 (2013).
- 487 44. Calin, G. A. *et al.* A MicroRNA signature associated with prognosis and  
488 progression in chronic lymphocytic leukemia. *N. Engl. J. Med.* **353**, 1793–801  
489 (2005).

- 490 45. Kminkova, J. *et al.* Identification of novel sequence variations in microRNAs  
491 in chronic lymphocytic leukemia. *Carcinogenesis* **35**, 992–1002 (2014).
- 492 46. Jazdzewski, K. *et al.* Common SNP in pre-miR-146a decreases mature miR  
493 expression and predisposes to papillary thyroid carcinoma. *Proc. Natl. Acad.*  
494 *Sci. U. S. A.* **105**, 7269–7274 (2008).
- 495 47. Tian, T. *et al.* A functional genetic variant in microRNA-196a2 is associated  
496 with increased susceptibility of lung cancer in Chinese. *Cancer Epidemiol.*  
497 *Biomarkers Prev.* **18**, 1183–1187 (2009).
- 498 48. Locke, J. M., Lango Allen, H. & Harries, L. W. A rare SNP in pre-miR-34a is  
499 associated with increased levels of miR-34a in pancreatic beta cells. *Acta*  
500 *Diabetol.* **51**, 325–9 (2014).
- 501 49. Zhou, H. *et al.* microRNA-30c negatively regulates endometrial cancer cells by  
502 targeting metastasis-associated gene-1. *Oncol. Rep.* **27**, 807–812 (2012).
- 503 50. Zhang, Q. *et al.* Role of microRNA-30c targeting ADAM19 in colorectal  
504 cancer. *PLoS One* **10**, e0120698 (2015).
- 505 51. Garofalo, M. *et al.* EGFR and MET receptor tyrosine kinase–altered  
506 microRNA expression induces tumorigenesis and gefitinib resistance in lung  
507 cancers. *Nat. Med.* **18**, 74–82 (2011).
- 508 52. Xing, Y. *et al.* MicroRNA-30c contributes to the development of hypoxia  
509 pulmonary hypertension by inhibiting platelet-derived growth factor receptor  $\beta$   
510 expression. *Int. J. Biochem. Cell Biol.* **64**, 155–166 (2015).
- 511 53. Moreno-Mateos, M. A. *et al.* Novel small RNA expression libraries uncover  
512 hsa-miR-30b and hsa-miR-30c as important factors in anoikis resistance. *RNA*  
513 **19**, 1711–25 (2013).
- 514 54. Nguyen, T. A. A. *et al.* Functional Anatomy of the Human Microprocessor.  
515 *Cell* **161**, 1374–1387 (2015).
- 516 55. Chakraborty, S., Mehtab, S., Patwardhan, A. & Krishnan, Y. Pri-miR-17-92a  
517 transcript folds into a tertiary structure and autoregulates its processing. *RNA*  
518 **18**, 1014–28 (2012).
- 519 56. Chaulk, S. G., Xu, Z., Glover, M. J. N. & Fahlman, R. P. MicroRNA miR-92a-  
520 1 biogenesis and mRNA targeting is modulated by a tertiary contact within the  
521 miR-17–92 microRNA cluster. *Nucleic Acids Res.* **42**, 5234–5244 (2014).
- 522 57. Du, P., Wang, L., Sliz, P. & Gregory, R. I. A Biogenesis Step Upstream of  
523 Microprocessor Controls miR-17–92 Expression. *Cell* (2015).  
524 doi:10.1016/j.cell.2015.07.008

525

526 **Figure legends**

527 **Figure 1** A genetic variant in the terminal loop of hsa-pri-mir-30c-1 alters its normal  
528 expression. **(a)** Schematic representation of the hsa-pri-mir-30c-1 transcript indicating  
529 the G to A mutation observed in breast and gastric cancer patients. Nucleotides (nt)  
530 encompassing primary (pri-miRNA; nt -159 to +161) and precursor miRNA (pre-  
531 miRNA; nt 1 to 61) used in this experiment are indicated. Numbers are relative to the  
532 first nt of the mature miRNA. **(b)** The relative expression levels of mature miR-30c in  
533 MCF7 cells transfected with plasmids encoding either a wild-type sequence (WT) or  
534 one bearing the G/A mutation (n=12) **(c)** Levels of mature miR-30c in MCF7 cells  
535 transfected with *in vitro* transcribed pri-mir-30c-1 (pri-miRNA) or an RNA  
536 oligonucleotide that mimics pre-miR-30c-1 (pre-miRNA) sequences, either in a  
537 wild-type or G/A version (n=5). Mann-Whitney U test was used to evaluate  
538 differences between WT and G/A samples. Error bars indicate SEM. \*\* p<0.01. **(d)**  
539 Representative *in vitro* processing of pri-mir-30c-1 (380 nt) in MCF7 total cell  
540 extracts. Quantification of pre-miRNA band intensities are shown below and  
541 expressed as the relative intensity normalized to pre-miR-30c-1 WT variant.

542

543 **Figure 2** Sequence conservation of pri-mir-30c-1 precursors **(a)** Nucleotide-level  
544 GERP scores across the locus, indicating extensive evolutionary constraint. A GERP  
545 score above zero indicates significant constraint, while a score below zero indicates  
546 an excess of nucleotide substitutions beyond the expected neutral rate. The purple  
547 bars display the total number of observed nucleotide substitutions found in aligned  
548 sequences from 98 vertebrates. Δ represents absence of the nucleotide from 98  
549 vertebrate sequences analyzed. The location of the modified G/A nucleotide is  
550 indicated by a green rectangle. **(b)** Model of the predicted secondary structure with

551 nucleotides colored as in (a) to reflect their variation. Nucleotides present in less than  
552 50% of the species are indicated in lower case.

553

554 **Figure 3** Structural analysis reveals the importance of the G to A substitution in pri-  
555 miR-30c-1 (a) Values of SHAPE reactivity (depicted using color coded bars) at each  
556 individual nucleotide position correspond to the mean SHAPE reactivity (+/- SEM)  
557 (n=10). (b) SHAPE differences plots of the G/A variant relative to the wild-type  
558 sequence. Only nucleotides with absolute differences bigger than 0.25 and statically  
559 significant are depicted (grey colors represent p-values). Bars above the basal line  
560 indicate increased SHAPE reactivity for the G/A variant, whereas those below the  
561 basal line indicate lower SHAPE reactivity. Mann-Whitney U test was used to  
562 evaluate differences between WT and G/A samples. (c) Predicted secondary  
563 structures of WT and G/A variant sequences, as determined by SHAPE reactivity  
564 values.

565

566 **Figure 4** Identification of trans-acting factors binding to pri-mir-30c-1. (a) Venn -  
567 diagram indicating the number of interactors observed for the WT sequence and the  
568 G/A variant. (b) Validation of the interaction of SRSF3 with the G/A variant sequence  
569 by RNA chromatography followed by Western-blot analysis with an antibody specific  
570 for SRSF3. (c) Immunoprecipitation with a specific anti-SRSF3 antibody followed by  
571 RT-qPCR quantification (+/- SEM) (n=4). (d) Representative toeprinting assay in the  
572 presence or absence of 260nM of purified SRSF3 protein using fluorescent-labeled  
573 primers and capillary electrophoresis. The unique RT stop in the G/A variant (n=2) is  
574 indicated. (e) Volcano plots showing the SHAPE reactivity data in the presence of  
575 260nM (left panel) or 500 nM (right panel) of purified SRSF3 protein. The red dots

576 indicate those positions protected by SRSF3 in a dose-dependent manner (n=5).  
577 Mann-Whitney U test was used to evaluate differences (f) Schematic representation of  
578 the basal stem of hsa-miR30c G/A illustrating the nucleotides protected by SRSF3 (in  
579 red) as well as the RT stop detected by toeprinting assay.

580

581 **Figure 5** Role of SRSF3 in miR-30c expression. (a) The relative expression levels of  
582 miR-30c WT and G/A in MCF7 cells with changing expression of SRSF3 protein.  
583 Error bars indicate SEM (n=5) \* p<0.05 \*\* p<0.01 (b) Mutational analysis of the  
584 CNNC motif. Nucleotides substitutions present in the CNNC region are shown in  
585 Red. Relative expression levels of miR-30c in MCF7 cells transfected with plasmids  
586 encoding either a wild-type sequence (WT) or one bearing the G/A mutation, and also  
587 including mutations in the CNNC motif, when indicated. Mann-Whitney U test was  
588 used to evaluate differences. Error bars indicate SEM (n=6) \* p<0.05 \*\* p<0.01.

589

590 **Figure 6** Representative *in vitro* processing assays of radiolabeled shorter pri-mir-  
591 30c-1 variants in the presence of immunopurified FLAG-Drosha/FLAG-DGCR8  
592 complexes (+) or FLAG immunoprecipitates (-), with addition of purified SRSF3  
593 protein (1x corresponds to 65nM of protein). (a, b) Processing of WT pri-mir-30c-1  
594 comprising or lacking SRSF3 binding sites (WT and WT ΔCNNC, respectively). (c,d)  
595 Processing of pri-mir-30c-1 G/A variant comprising or lacking SRSF3 binding sites  
596 (G/A and G/A ΔCNNC, respectively). Quantification of pre-miRNA band intensities  
597 are shown below and expressed as the relative intensity normalized to *in vitro*  
598 processing assay in the absence of purified SRSF3 protein (lane 3 in each case).

599

600 **Figure 7** Cartoon depicting a model whereby the genetic variant identified in pri-mir-  
601 30c-1 leads to a secondary RNA structure rearrangement that facilitates binding of  
602 SRSF3 resulting in increased Microprocessor-mediated processing of pri-miR-30c-1.

603

604 **Supplementary Figure 1** Representative *in vitro* processing of shorter pri-mir-30c-1  
605 substrates (153nt) comprising either a wild-type sequence (WT) or bearing the G/A  
606 mutation in the presence of immunopurified FLAG-Drosha/FLAG-DGCR8  
607 complexes (+) or FLAG immunoprecipitates (-). Quantification of pre-miRNA band  
608 intensities are shown below and expressed as the relative intensity normalized to pre-  
609 mir-30c-1 WT variant (lane 3). Intervening lanes were removed from the gel image,  
610 which is indicated by the black vertical line.

611

612 **Supplementary Figure 2 (a)** Histograms of cleavage intensity versus nucleotide  
613 position determined using *in situ*-generated hydroxyl radicals values corresponding to  
614 the mean cleavage (+/- SEM) (n=6). **(b)** Predicted secondary structures of WT and  
615 G/A variant sequences, as determined by hydroxyl radical reactivity values.

616

617 **Supplementary Figure 3** Identification of proteins interacting with WT and G/A pri-  
618 miR30c-1 sequences. **(a)** Table shows proteins identified in two independent  
619 experiments. **(b)** Validation of the interaction of SRSF3 with the G/A variant  
620 sequence by RNA immunoprecipitation followed by Western Blot analysis with  
621 specific antibodies.

622



623 **Supplementary Figure 4** SRSF3 levels following knock-down or overexpression in  
624 MCF7 cells. **(a)** Analysis of SRSF3 mRNA levels. Error bars indicate SEM (n=5). **(b)**  
625 Representative Western blot of SRSF3 protein levels.

626

627 **Supplementary Figure 5** Detection of SRSF3 protein in FLAG-Drosha/FLAG-  
628 DGCR8 complexes used in the *in vitro* processing assays shown on Fig 6 and  
629 Supplementary Figure 1. FLAG immunoprecipitates of control cells or cells  
630 transfected with FLAG-Drosha + FLAG-DGCR8 were analyzed in a Western blot  
631 assay with an anti-SRSF3 specific antibody.

632

## 633 **ONLINE METHODS**

### 634 **Plasmids constructions**

635 Pri-mir-30c-1 construct was amplified from human genomic DNA by PCR with  
636 specific primers 30c1s (5'-CAAGTGTTCTGTGTTTTTATTG-3') and 30c1a (5'-  
637 GTACTTAGCCACAGAAGCGCA-3') The PCR product was digested with *EcoRI*  
638 and was subsequently cloned into the pCDNA3.1 vector (ThermoFisher). The G<sub>27</sub> to  
639 A mutation was generated by a two-step PCR strategy. First, pri-miR-30c-1 was  
640 amplified with a 30Cmut1 oligo (5'-CCTTGAGCTTACAGCTGAGAG-3') and  
641 30c1s and also with 30Cmut2 oligo (5'-CTCTCAGCTGTAAGCTCAAGG-3') and  
642 30c1a. Both PCR products, were purified (Qiagen), pooled and used as a template for  
643 amplification with 30c1s and 30c1a primers. The resulting PCR product was cloned in  
644 pGEMt (Promega). pGEMt G/A plasmid was digested with *EcoRI* to clone in  
645 pCDNA3.1. The CNNC motifs were subjected to site-specific mutagenesis by PCR  
646 amplification, as previously described<sup>58</sup>. Briefly, 10 ng of pri-miR30c-1 (WT or G/A)  
647 was PCR amplified with the desired mutagenic oligonucleotide



648 (mut1: 5'-CTTCATTTGATGTTTTCCATGGC-3',  
649 mut2: 5'-CTTCTTTTTTTTTTTTCCATGGC-3' or  
650 CNNC 5'-CTTCAGATGTTTTCCATGGC-3')  
651 and CNNCs primer (5'-CTGCTTACTGGCTTATCG-3'). The PCR product was  
652 cleaned (Qiagen) and used as the 5'-flanking primer in a second PCR with an equal  
653 molar amount of primer CNNCa (5'-GATATCTGCAGAATTCCTAG-3'). The  
654 product of the second PCR was digested with *EcoRI* (New England Biolabs), purified  
655 by agarose gel electrophoresis and ligated to the large *EcoRI* fragments of primiR-  
656 30c-1 to produce the desired constructs (CNNCmut1, mut2 and ΔCNNC). All the  
657 sequences were confirmed by automatic sequencing.

## 658 **Cell Culture**

659 MCF7 and HEK 293T cells were grown in high glucose Dulbecco's modified Eagle's  
660 medium (Invitrogen) supplemented with 10% (v/v) fetal calf serum (Invitrogen) and  
661 penicillin-streptomycin (Invitrogen) and incubated at 37°C in the presence of 5%  
662 CO<sub>2</sub>. Cells were tested for mycoplasma contamination.

663

## 664 **Transfections**

665 MCF7 cells grown in 24-well plates were transfected with either pri-mir-30c-1 (WT  
666 or G/A) constructs, *in vitro* transcribed RNA (0.33μg/10<sup>5</sup> cells), or oligonucleotides  
667 encoding pre-mir-30c (Sigma Aldrich)  
668 (5'UGUAAACAUCUACACUCUCAGCUGUGAGCUCAAGGUGGCUGGGAGA  
669 GGGUUGUUUACUCC-3') using Attractene (Qiagen), following manufacturer's  
670 instruction. pCDNA-3, pri-miR-30a or oligo30a  
671 (5'UGUAAACAUCUACGACUGGAAGCUGUGAAGCCACAAAUGGGCUUUA  
672 GUCGGAUGUUUGCAGC-3') were used as negative controls in DNA or RNA

673 transfections, respectively. Cells extracts were prepared at 8h or 48h (after RNA/DNA  
674 addition) by direct lysis using 100 µl of lysis buffer (50mM Tris-HCl at pH 7.8, 120  
675 mM NaCl, 0.5% NP40). For SRSF3 gene silencing/overexpression MCF7 cells grown  
676 in 15 cm dishes were transfected with ON-TARGETplus siRNA (Dharmacon) or  
677 pCG. As negative controls, cells were transfected with ON-Targetplus Non-targeting  
678 siRNAs and pCG-T7 plasmid, respectively. Cells were split in 24-well dishes 24h  
679 after transfection and 24h later transfected with different versions of pri-miRNA  
680 constructs. HEK 293Ts were grown to 70% confluency in 6-well plates and then  
681 transiently co-transfected with 3µg of FLAG-Drosha and 1µg of FLAG-DGCR8, or  
682 4µg FLAG-empty vector per well. Cells were expanded for 24h, then split to 10cm  
683 plates and expanded for a further 24hr before cells were scraped, collected and snap  
684 frozen until required.

685

#### 686 **SRSF3 purification**

687 Purification of SRSF3 from MCF7 cells was performed as previously described<sup>59</sup>,  
688 with minor modifications. Briefly, MCF7 cells were grown to confluence in 15 cm  
689 dishes and transient transfected with 15 µg of pCG-T7-SRSF3<sup>60</sup>. Forty eight hours  
690 after transfection cell pellets were resuspended in 20ml of ice-cold lysis buffer (50  
691 mM NaP buffer, pH8, 0.5 M Na Cl, 5 mM b-glycerophosphate, 5 mM KF, 0.1 %  
692 Tween 20, and 1x protease inhibitor cocktail) and sonicated 5 times 30s followed by  
693 centrifugation at maximum speed for 20 min at 4°C. After centrifugation the  
694 supernatant was loaded into a chromatography column (Biorad) previously prepared  
695 with T7 Tag antibody Agarose (Novagen). The flow-through was collected and  
696 loaded a second time. The column was washed two times with 10 ml of lysis buffer.  
697 Then, eluates were eluted with 10 serial 0.8 ml volumes of elution buffer (0.1 M citric

acid, pH 2.2, 5  $\mu$ M  $\beta$ -glycerophosphate and 5mM KF) and collected in microcentrifuge tubes containing 200  $\mu$ l of 1M Tris pH 8.8 mixed and stored at 4°C. The fractions were analysed on SDS page (Invitrogen) followed by Coomassie blue staining. The elutes containing the protein were dialyzed overnight against BC100 buffer (20 mM Tris, pH8, 100 mM KCl, 0.2 mM EDTA pH8 and 20% glycerol), and stored in aliquots at -80°C.

704

#### 705 **Western blot analysis**

Equal amounts of total protein (determined by Bradford assay) were loaded in 12% NUPAGE gels (Invitrogen) and transferred to cellulose membranes using IBLOT system (Invitrogen). Identification of SRSF3 was performed with a rabbit polyclonal antibody (RN080PW, MBL, Dilution 1:500), followed by a secondary horseradish peroxidase-conjugated antibody and ECL detection (Pierce). Other primary antibodies used in this study were: mouse monoclonal anti-PARP-1 antibody (E-8): sc-74469, Santa Cruz Biotechnology, Dilution 1:500 ); Rabbit polyclonal anti-DDX17 antibody ((S-17): sc-86409, Santa Cruz Biotechnology, Dilution 1:500); Rabbit polyclonal anti-hnRNP A1 antibody (PA5-19431, Invitrogen antibodies, Dilution 1:500); Rabbit polyclonal anti-TLS/FUS antibody (ab23439, Abcam, Dilution 1:1000).

716

#### 717 ***In vitro* transcription of pri-miRNA substrates**

Prior to RNA synthesis, pri-mir-30c-1 plasmids (wild-type and G/A variant) were linearized using *ApaI* (New England Biolabs). In addition, shorter pri-mir-30c-1 probes were PCR amplified from pri-mir-30c-1 plasmids (wild-type, G/A, and their respective  $\Delta$ CNNC) for *in vitro* processing assays (shown on **Fig. 6** and **Supplementary Fig. 1**) using a forward primer harboring a T7-promoter sequence

723 fused to a 19nt sequence complementary to pri-mir-30c-1 (5'-  
724 AATACGACTCACTATAGGGCTGATCAACCCTGGACC-3') and a reverse primer  
725 (5'- AGTGGAGACTGTTCTTCTTC-3'), which when *in vitro* transcribed generated  
726 a 153nt (CNNC) or 146nt ( $\Delta$ CNNC) and then subsequently PCR purified (Qiagen) for  
727 *in vitro* transcription. 1 $\mu$ g of DNA or 400ng of PCR product were *in vitro* transcribed  
728 for 1-2h at 37°C using 50 U of T7 RNA polymerase (Roche) in the presence of 0.5  
729 mM rNTPs and 20 U of RNasin (Promega). When needed, RNA transcripts were  
730 labeled using ( $\alpha$ -<sup>32</sup>P)-UTP (800 Ci/mmol, Perkin Elmer) and following DNase  
731 treatment, unincorporated <sup>32</sup>P-UTP was eliminated by exclusion chromatography in  
732 TE equilibrated columns (GE Healthcare) or PAGE gel purification, followed by  
733 phenol/chloroform and ethanol precipitation.

734

### 735 ***In vitro* processing assays**

736 The *in vitro* processing reactions were performed as previously described<sup>61</sup> with  
737 minor modifications. Radiolabeled *in vitro* transcribed pri-mir-30c-1 (50,000 c.p.m.)  
738 was incubated with 650 $\mu$ g of MCF7 total cell extract (Fig. 1d), or incubated with  
739 FLAG-tagged complexes immunopurified from HEK293T cells transiently co-  
740 expressing FLAG-Drosha & FLAG-DGCR8 or FLAG-empty vector control, in the  
741 absence or RNase<sup>62</sup> (**Fig. 6** and **Supplementary Fig. 1**). Additionally, *in vitro*  
742 processing reactions were supplemented with increasing concentrations of  
743 immunopurified T7-SRSF3 (**Fig. 6**). The *in vitro* processing reactions were performed  
744 in the presence of buffer A (0.5 mM ATP, 20 mM creatine phosphate and 6.4 mM  
745 MgCl<sub>2</sub>). Reactions were incubated for 1h at 37°C and treated with proteinase K. RNA  
746 was extracted by phenol/chloroform and ethanol precipitation. Samples were resolved  
747 in an 8% 1 $\times$  TBE polyacrylamide urea gel.

748

749 **miRNA qRT-PCR**

750 The relative amounts of miR-30c present in total RNA samples were measured using  
751 Exiqon miRCURY LNA<sup>TM</sup> following manufacturer's instructions. Total RNA from  
752 cytoplasmic lysates was isolated using RNazol (Invitrogen) and RT was carried out  
753 with Universal RT microRNA PCR using 500 ng of RNA. A 1/20 dilution of the RT  
754 reaction was used for qPCR with a specific microRNA LNA<sup>TM</sup> primers set and the  
755 LightCycler system with the FastStart DNA Master Green II (Roche). The amount of  
756 miR-30c detected in the reaction was normalized by a parallel reaction performed  
757 with U6 and SNOR48 primers.

758

759 **Quantitative RNA co-immunoprecipitation (qRNAco-IP)**

760 The qRNAco-IP was performed as previously described<sup>63</sup>, with several modifications.  
761 Briefly, lysates from pri-miR-30c-1 (WT and G/A) transfected cells were pre-cleared  
762 with mouse IgG beads followed by incubation with a polyclonal rabbit anti-SRSF3  
763 antibody (MLB). The complexes were pulled-down using protein G beads  
764 (Amershan), then treated with proteinase K (Sigma) and RNA was extracted and  
765 purified using Trizol (Invitrogen). qRT-PCR was carried out with superscriptIII  
766 (Invitrogen) RT using 500ng of RNA as a template and the TL  
767 (5'-GGAGTAAACAACCCTCTCCCAGC-3')

768 and actin (5'-GGTCTCAAACATGATCTGGG-3') primers. Then a 1/20 dilution of  
769 the RT reaction was used for qPCR with appropriate pairs of specific primers

770 (TL: 5'-CATCCTACACTCTC-3' and  
771 5'-GGAGTAAACAACCCTCTCCCAGC-3',  
772 actin: 5'-GGGTCAGAAGGATTCCTATG-3' and

5'-GGTCTCAAACATGATCTGGG-3'). qRNAco-IP values were calculated according to the formula:  $\frac{\text{qPCR value TL mRNA IP}}{\text{qPCR value TLmRNA total}} / \frac{\text{qPCR value control mRNA IP}}{\text{qPCR value control mRNA total}}$

776

### 777 **Evolutionary constraint**

Evolutionary constraint was quantified for individual nucleotide positions as the number of rejected substitutions, as calculated by the GERP++ algorithm. This data was extracted from the UCSC genome browser, where they had been calculated over their 36-way mammalian genome alignments.

782

### 783 **Phylogenetic conservation**

The alignment of 98 vertebrate sequences of pri-mir-30c-1 were retrieved from UCSC genome browser. Each nucleotide frequency was plotted in a heat map. RNA structure models were performed using RNAstructure software (<http://rna.urmc.rochester.edu/RNAstructureWeb/>). The most energetically stable RNA structure according to the program was used to depict the model of pri-mir-30c-1.

790

### 791 **SHAPE analysis**

Pri-mir-30c-1 RNA was treated with NMIA (Invitrogen), as previously described<sup>64</sup>. For primer extension, equal amounts of NMIA treated and untreated RNA (0.5 pmols) were incubated with 2 pmol of 5'-end fluorescently-labeled primer (5'-CTAGATGCATGCTCGAGCG-3'). NED fluorophore was used for both, treated and not treated RNAs while VIC fluorophore was used for the sequencing ladder, as described previously. cDNA products were resolved by capillary electrophoresis<sup>64</sup>.

798 Pri-miR-30c-1-SRSF3 complexes were assembled in folding buffer (100 mM HEPES  
799 pH 8, 6 mM MgCl<sub>2</sub>) using 170 nM RNA in the presence of increasing amounts of  
800 purified SRSF3 protein (260 and 500 nM). Then, RNA alone or pre-incubated with  
801 SRSF3 was treated with NMIA. RNA was phenol extracted and ethanol precipitated  
802 and then subjected to primer extension analysis.

803

#### 804 **Hydroxyl radical footprinting**

805 Pri-mir-30c-1 RNA was subjected to Hydroxyl radical footprinting, as previously  
806 described<sup>65</sup>. Briefly, 1.7 pmol of RNA was denatured and folded in folding buffer  
807 (40 mM MOPS pH 8.0, 80 mM KOAc, and 0, 0.5 or 6 mM MgCl<sub>2</sub>). Samples were  
808 incubated with 1 µL of the Fe(II)–EDTA complex, 1 µL of sodium ascorbate and 1 µL  
809 of hydrogen peroxide for 30 s at 37 °C. Fe(II)–EDTA  
810 (7.5 mM Fe(SO<sub>4</sub>)<sub>2</sub>(NH<sub>4</sub>)<sub>2</sub>·6H<sub>2</sub>O and 11.25 mM EDTA, pH 8.0), 0.3% hydrogen  
811 peroxide and 150 mM sodium ascorbate solutions were freshly prepared. As a control  
812 a lacking Fe(II)–EDTA reaction was performed. Samples were quenched and  
813 precipitated by addition of one-third of 75% glycerol, 1 µL of 20 mg·mL<sup>-1</sup> glycogen,  
814 1 µL of 3 M NaCl, 2 µL of 0.5 M EDTA and 2.5 volumes of ice-cold ethanol. RNAs  
815 were re-suspended and reverse-transcribed using fluorescent primers as described  
816 for SHAPE reactivity. cDNA products were resolved by capillary electrophoresis.

817

#### 818 **SHAPE reactivity and Hydroxyl radical cleavage data analysis**

819 SHAPE electropherograms of each RT were analyzed using the quSHAPE software<sup>66</sup>.  
820 Then, data from 10 independent assays were used to calculate the mean of SHAPE  
821 reactivity. To minimize the technical variation, each RT stop quantitative value was  
822 normalized to the total intensity of the average of 10 highly reactive nucleotides in the

823 reaction. Grubbs' test was used to identify outliers. To obtain SHAPE differences  
824 between pri-mir-30c WT and GA or Free RNA and RNA-SRSF3 complexes, the  
825 SHAPE reactivity values obtained in WT or free RNA were subtracted from the  
826 reactivity values obtained in GA or in the presence of the protein. The statistical  
827 analysis was performed by Mann–Whitney *U* test. Only nucleotides with absolute  
828 differences larger than 0,25 and statistically significant were considered. Hydroxyl  
829 radical cleavage intensities of each reaction were also analyzed using quSHAPE  
830 software<sup>66</sup>. Then, data from 6 independent assays were used to calculate the mean of  
831 hsa-pri-mR-30c WT or GA cleavage. Grubbs' test was used to identify outliers.  
832 Buried regions were defined as zones with more than two consecutive nucleotides  
833 having a reactivity (R) smaller than the mean of all reactivity, whereas exposed  
834 regions are those with more than two consecutive nucleotides having R larger than the  
835 mean of all reactivity.

836

### 837 **Toeprint assays**

838 This assay carried out following the protocol previously described<sup>35</sup>, with minor  
839 modifications. Briefly, pri-mir-30c-1: SRSF3 complexes were assembled as described  
840 for SHAPE analysis. After protein incubation samples were subsequently subject to  
841 primer extension using fluorescent primer (NED) 5'CTAGATGCATGCTCGAGCG-  
842 3.pri-miR-30c. Primer extension products were extracted with phenol, and ethanol  
843 precipitated pellets were resuspended in 5 µl of HI-Di<sup>TM</sup> formamide  
844 (ThermoFisher), which included 0.5 µl of GeneScan<sup>TM</sup> 500 Liz<sup>TM</sup> dye size standards.  
845 The products were separated by capillary electrophoresis and analyzed by  
846 GeneMarker software.

### 847 **RNA chromatography**



848 RNase-assisted RNA chromatography with RNase A/T1 was performed, as  
849 described<sup>28</sup>, using *in vitro* transcribed pri-mir-30c-1 and total MCF7 cell extracts.  
850 RNA-bound proteins were separated using 4-12% NUPAGE bis-tris system  
851 (Invitrogen) and individual lanes were subjected to mass spectroscopy (BSRC Mass  
852 Spectrometry and Proteomics Facility, University of St Andrews). Results were  
853 confirmed by Western blot analysis with anti-SRSF3 (MLB), anti-PARP-1 (Santa  
854 Cruz), anti-DDX17 (Santa cruz), anti-hnRNPA1 (Thermo Scientific) and anti-FUS  
855 (abcam) specific antibodies.

856

# 857 SUPPLEMENTARY REFERENCES

- 858 58. Perrin, S. & Gilliland, G. Site-specific mutagenesis using asymmetric  
859 polymerase chain reaction and a single mutant primer. *Nucleic Acids Res.* **18**,  
860 7433–8 (1990).
- 861 59. Cazalla, D., Sanford, J. R. & Cáceres, J. F. A rapid and efficient protocol to  
862 purify biologically active recombinant proteins from mammalian cells. *Protein*  
863 *Expr. Purif.* **42**, 54–8 (2005).
- 864 60. Cáceres, J. F., Misteli, T., Sreaton, G. R., Spector, D. L. & Krainer, A. R. Role  
865 of the modular domains of SR proteins in subnuclear localization and  
866 alternative splicing specificity. *J. Cell Biol.* **138**, 225–38 (1997).
- 867 61. Heras, S. R. *et al.* The Microprocessor controls the activity of mammalian  
868 retrotransposons. *Nat. Struct. Mol. Biol.* **20**, 1173–81 (2013).
- 869 62. Lee Y, Kim VN. In vitro and in vivo assays for the activity of Drosha complex.  
870 *Methods Enzymol* **427**, 89–106 (2007).
- 871 63. Tenenbaum, S. a., Lager, P. J., Carson, C. C. & Keene, J. D. Ribonomics:  
872 Identifying mRNA subsets in mRNP complexes using antibodies to RNA-  
873 binding proteins and genomic arrays. *Methods* **26**, 191–198 (2002).
- 874 64. Fernández, N., García-Sacristán, A., Ramajo, J., Briones, C. & Martínez-Salas,  
875 E. Structural analysis provides insights into the modular organization of  
876 picornavirus IRES. *Virology* **409**, 251–261 (2011).
- 877 65. Lozano, G., Fernandez, N. & Martinez-Salas, E. Magnesium-dependent folding  
878 of a picornavirus IRES element modulates RNA conformation and eIF4G  
879 interaction. *FEBS Journal* **281**, 3685–700 (2014).
- 880 66. Karabiber, F., McGinnis, J. L., Favorov, O. V & Weeks, K. M. QuShape: rapid,  
881 accurate, and best-practices quantification of nucleic acid probing information,  
882 resolved by capillary electrophoresis. *RNA* **19**, 63–73 (2013).

883

884

Fig 1

**a**

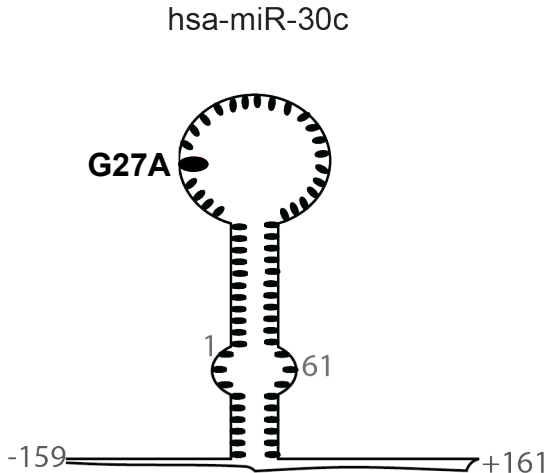

**b**

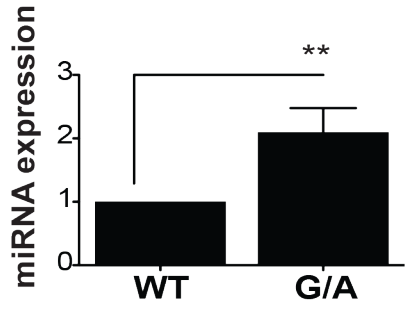

**c**

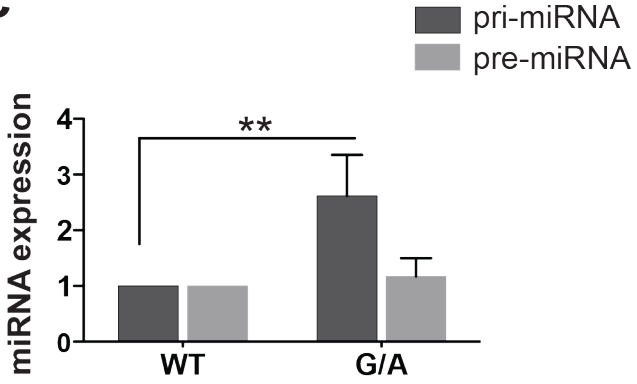

**d**

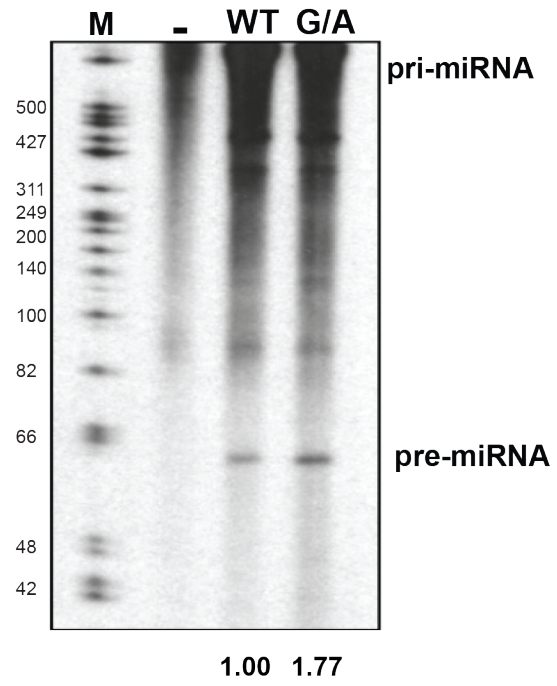

Fig 2

bioRxiv preprint doi: <https://doi.org/10.1101/093179>; this version posted December 12, 2016. The copyright holder for this preprint (which was not certified by peer review) is the author/funder, who has granted bioRxiv a license to display the preprint in perpetuity. It is made available under aCC-BY 4.0 International license.

a

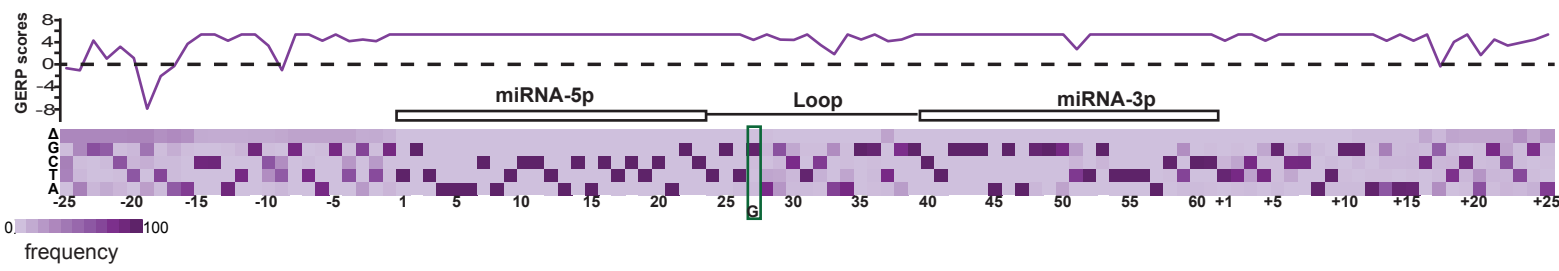

b

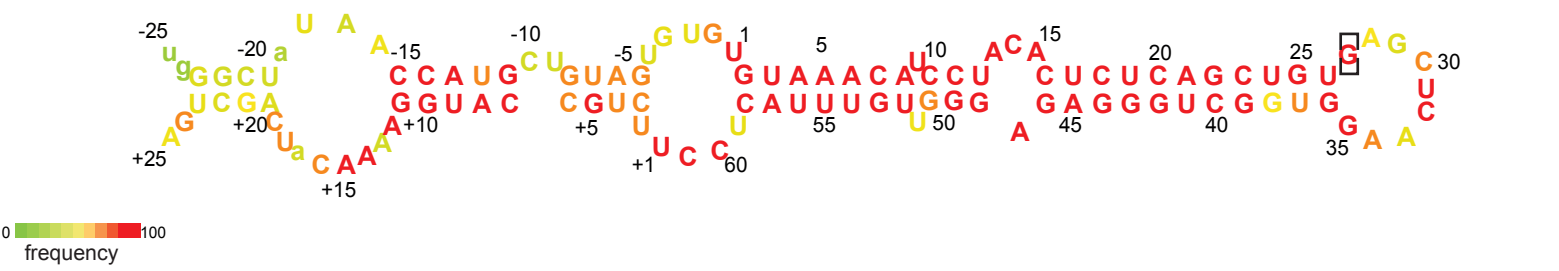

Fig 3 bioRxiv preprint doi: <https://doi.org/10.1101/093179>; this version posted December 12, 2016. The copyright holder for this preprint (which was not certified by peer review) is the author/funder, who has granted bioRxiv a license to display the preprint in perpetuity. It is made available under aCC-BY 4.0 International license.

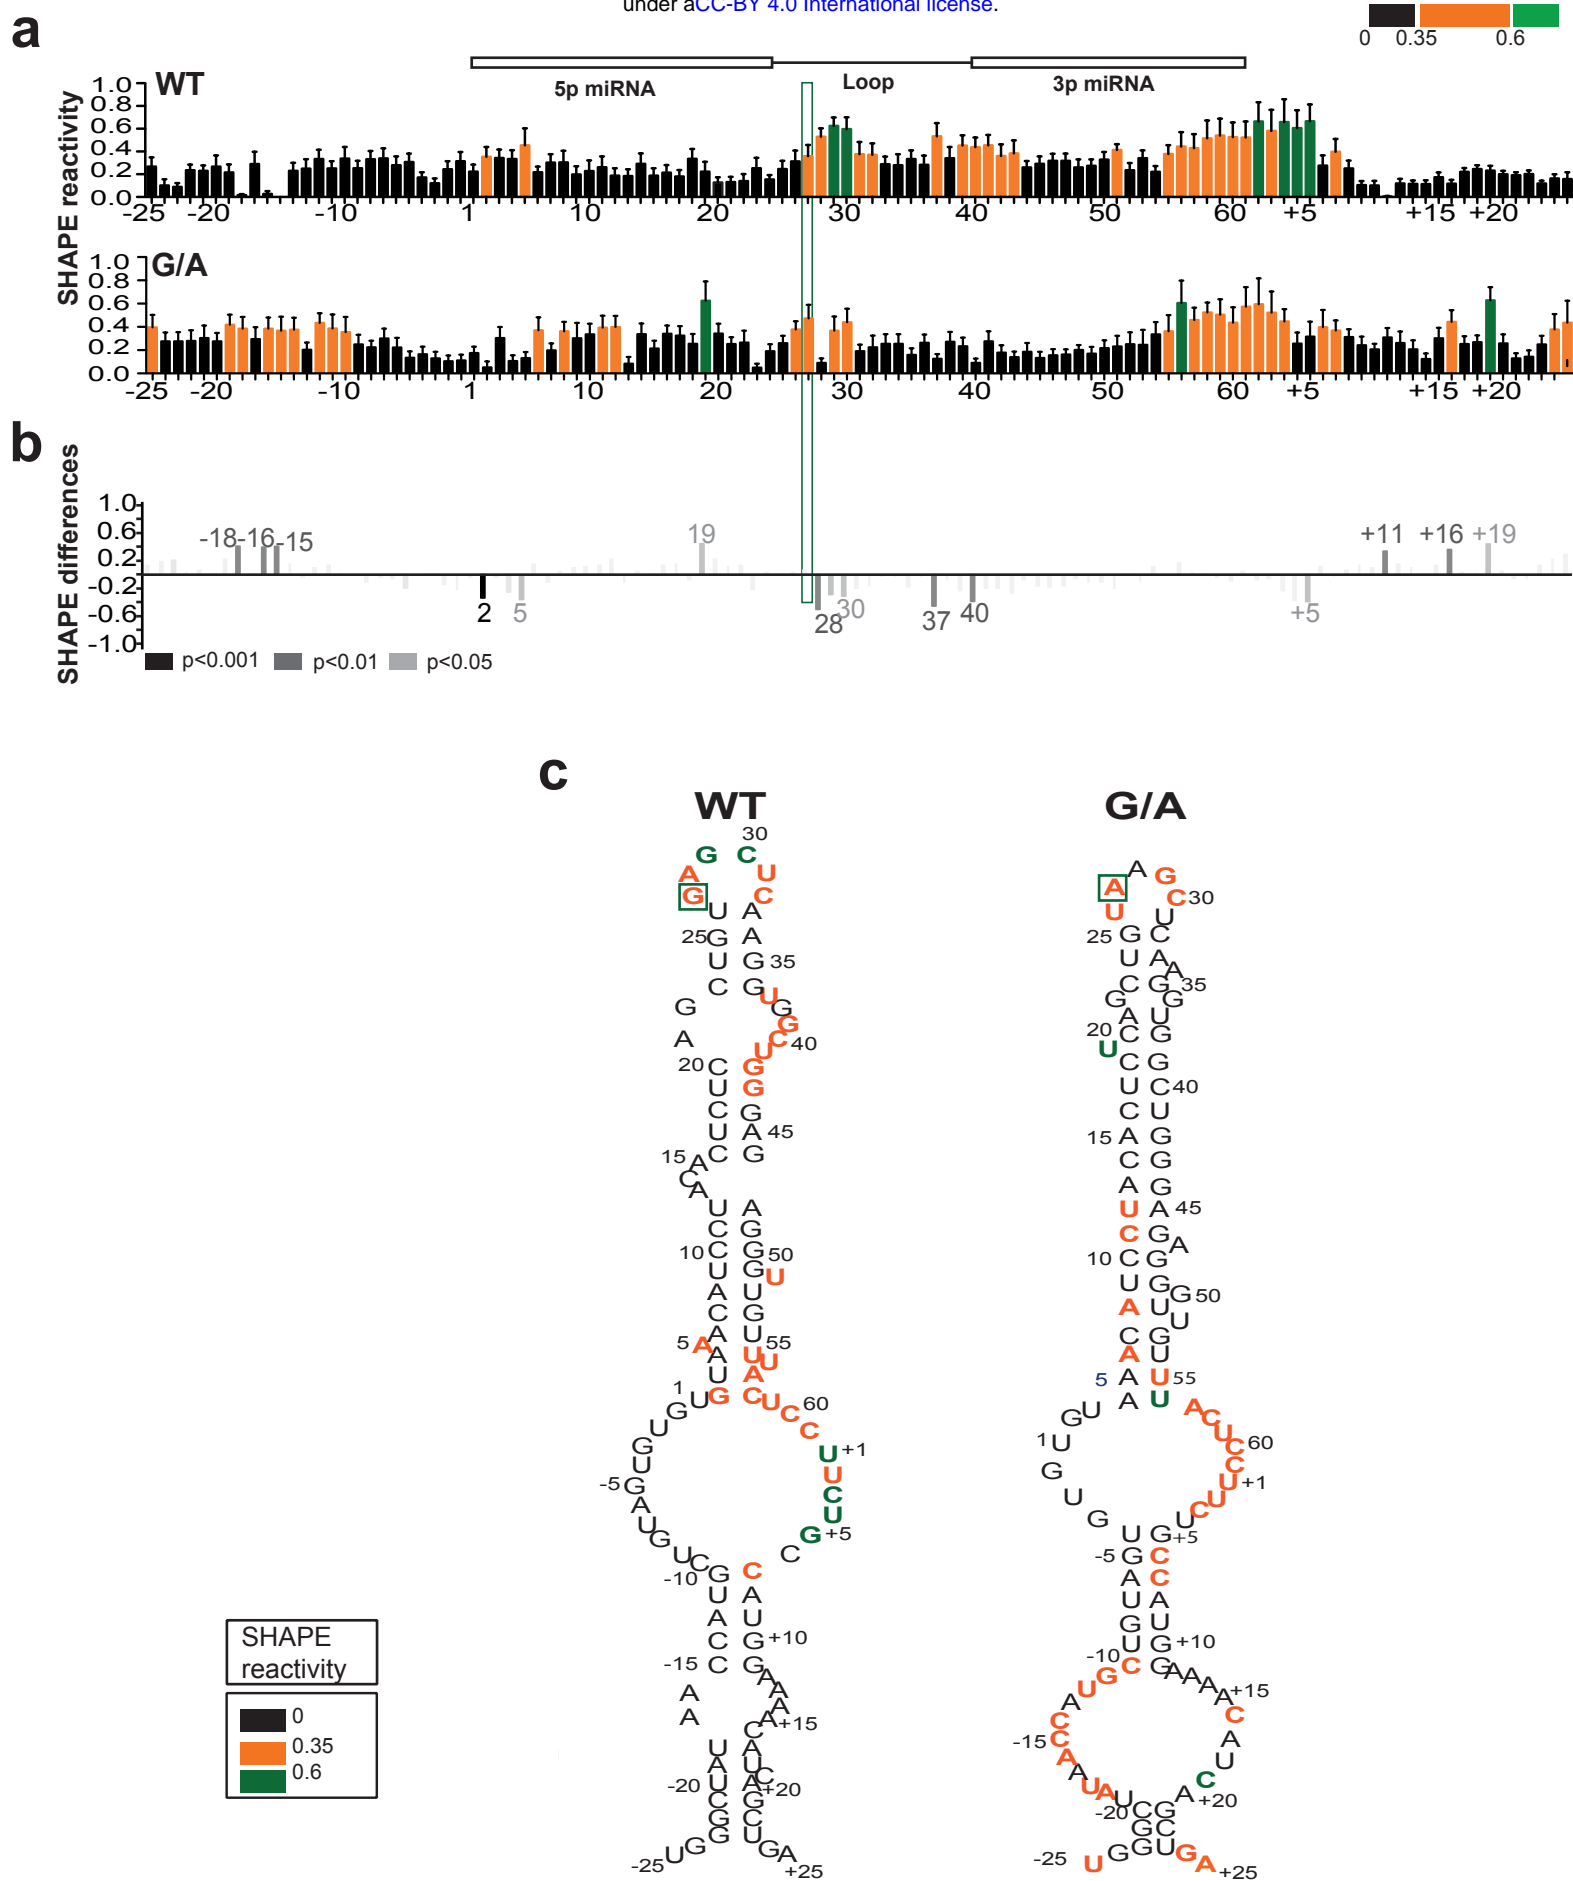

Fig 4

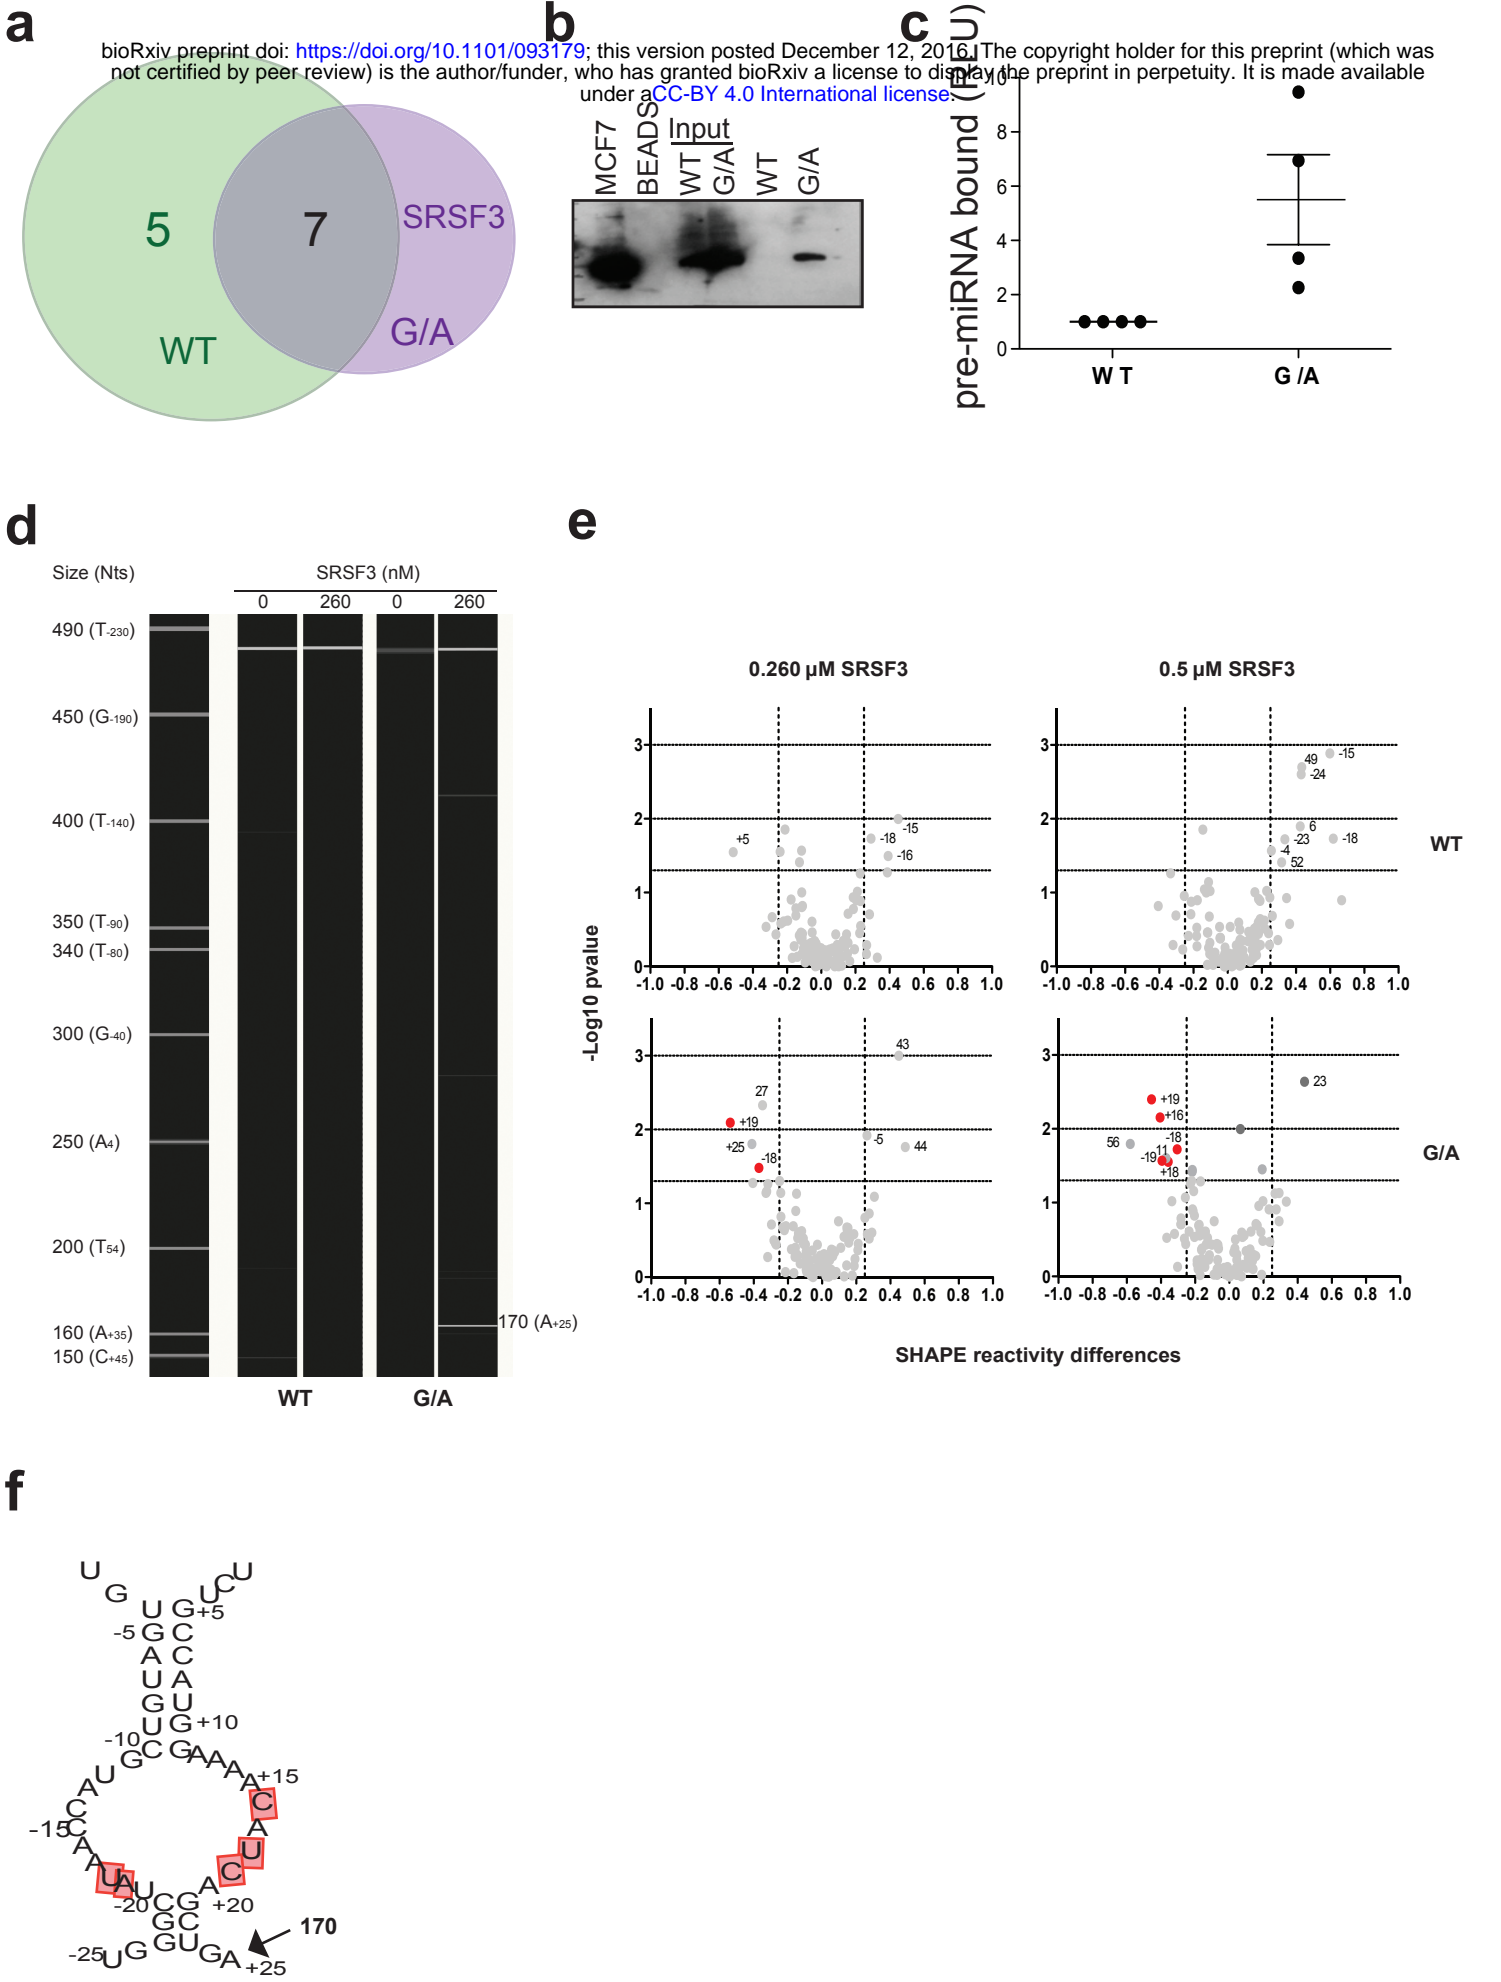

Fig 5

**a**

bioRxiv preprint doi: <https://doi.org/10.1101/093179>; this version posted December 12, 2016. The copyright holder for this preprint (which was not certified by peer review) is the author/funder, who has granted bioRxiv a license to display the preprint in perpetuity. It is made available under aCC-BY 4.0 International license.

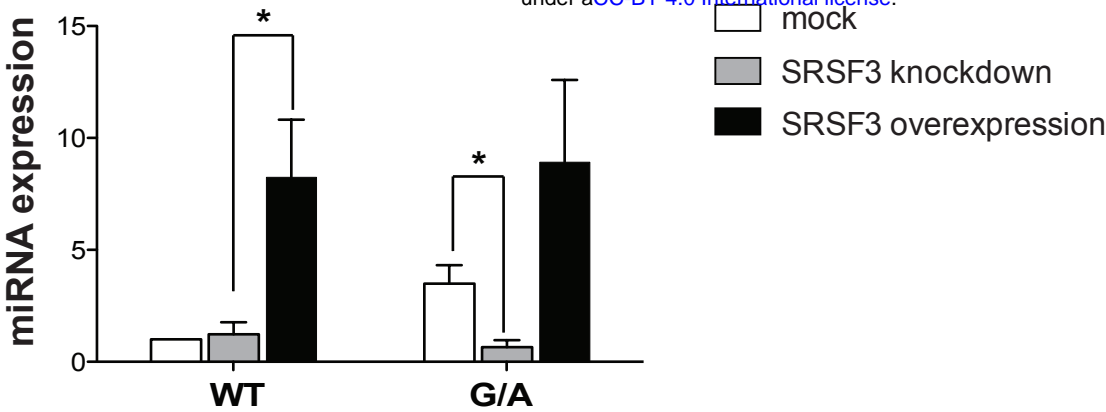

**b**

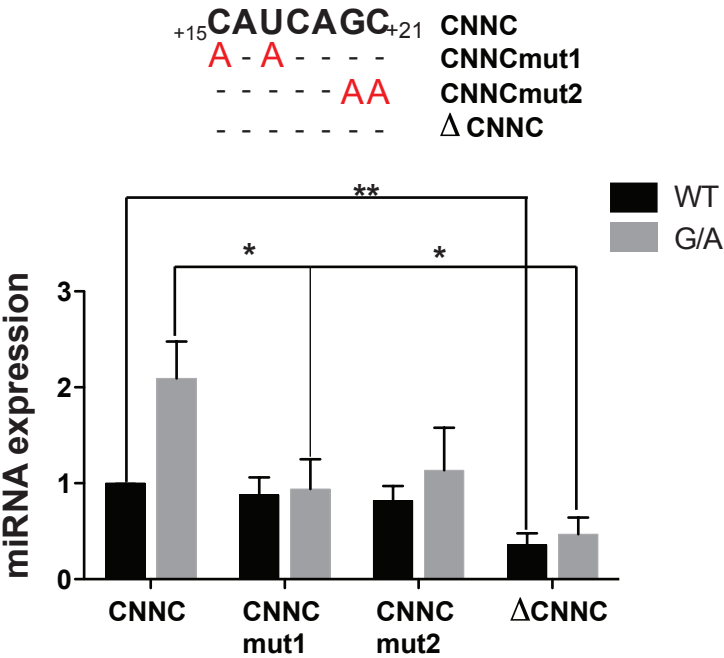

Fig 6

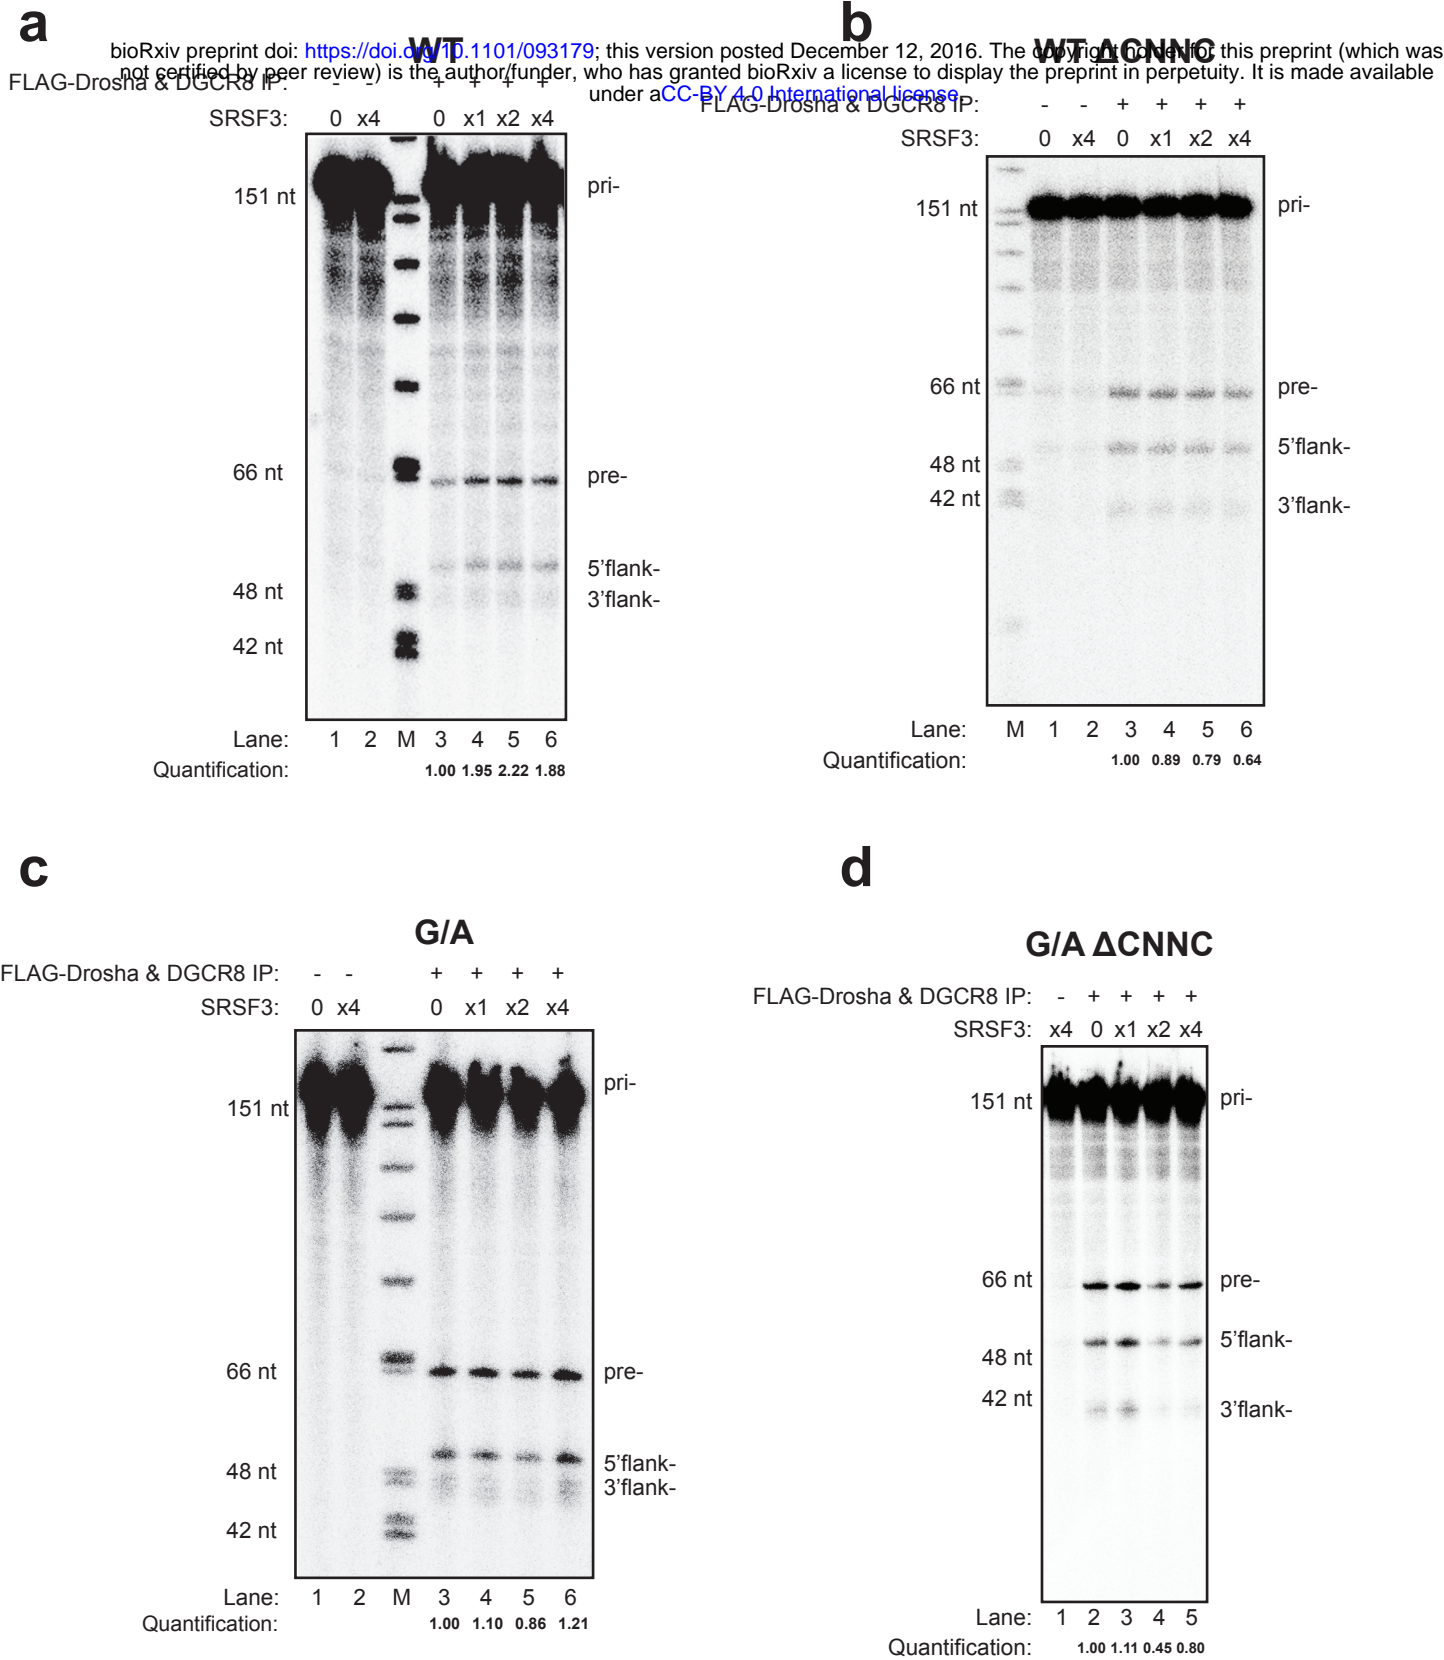

Fig 7

bioRxiv preprint doi: <https://doi.org/10.1101/093179>; this version posted December 12, 2016. The copyright holder for this preprint (which was not certified by peer review) is the author/funder, who has granted bioRxiv a license to display the preprint in perpetuity. It is made available under aCC-BY 4.0 International license.

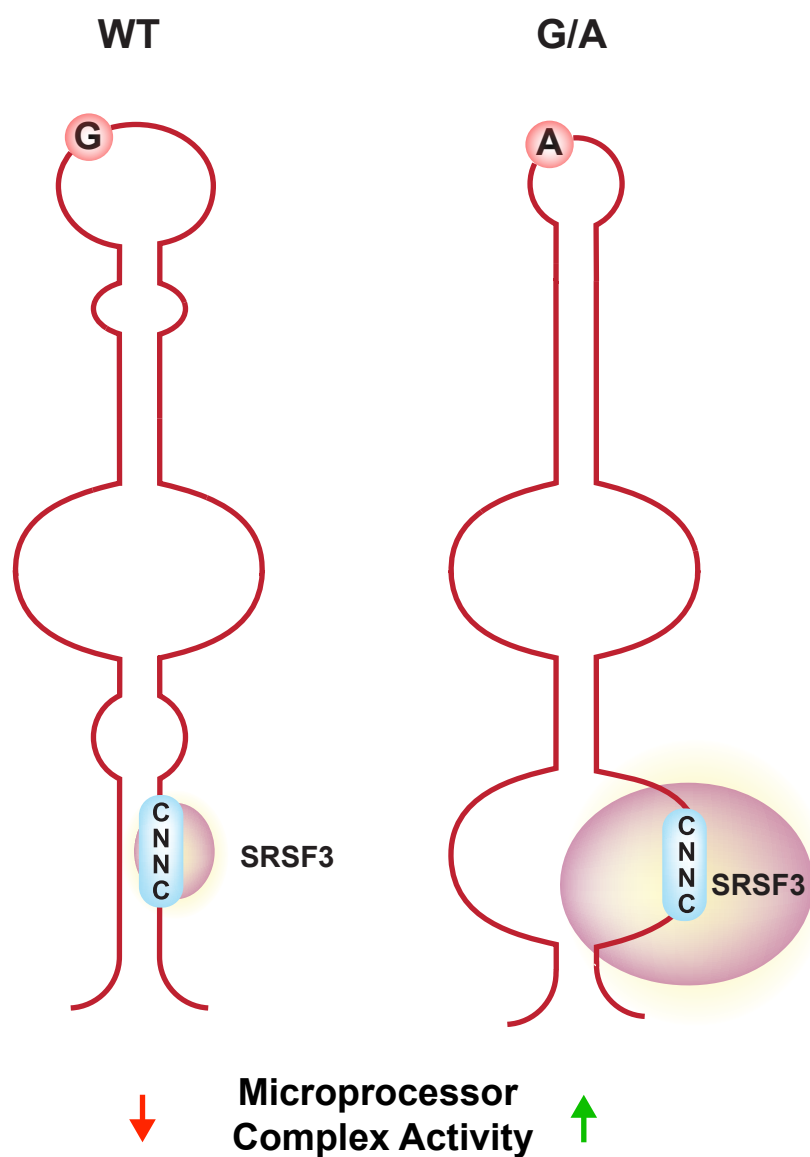

Source: http://biorxiv.org/content/10.1101/093179v1.full.pdf
